# Supplementary material for: Comparative RNA sequencing reveals substantial genetic variation in endangered primates
Source: HighWire-hosted journal article supplement (doi:10.1101/gr.130468.111), 2011-12-29
Supplement: SuppTable3.xlsx [file SuppTable3.xlsx]

## Sheet: Sheet1
Species	Gene	Position	Heterozygous individual	F primer seq	R primer seq	Validation	Comment
Human	A1BG	543	Hsa56655	CTCCCTGGCTCTCGATGG	GAGCTCCTCAATGGTCACAG	SNP
Human	AADAC	932	Hsa58876	CCTTGATGACCCAGATGTCA	AGATTTTCCTTTAGCCACTCAA	SNP
Human	AGXT	282	Hsa56720	AGGCATCCAGTACGTGTTCC	CTATGCGCTCCCCGATGT	SNP
Human	AHSG	976	Hsa56720	ACCAGAAGGTGCCAATGAAG	CGGACATGGAGGAACCACT	SNP
Human	ALDH4A1	1183	Hsa58876	CGGAAAGAACTTCCACTTCG	TTTGATCCGACTGTGCTCCT	SNP
Human	APCS	497	Hsa56295	CCTCAGTGGGAAGGTGTTTG	CACCAAGGGTTTGATGATGA	SNP
Human	ARHGDIB	554	Hsa56295	TTATGGTTGGCAGCTATGGAC	TTAATCGACAGGTTCCACTCC	SNP
Human	ARHGEF10L	3648	Hsa56295	GGTCTCACTCAATGGGCACT	CAGATGAGGAGGGTGCTGTC	SNP
Human	BHMT	768	Hsa56720	CCATCATTGGTGTGAACTGC	TCTGGGAGATCGATGAATCC	SNP
Human	BTG1	706	Hsa56655	TCACTGGTTCCCAGAAAAGC	AGTTTTTGGAAGGGCTCGTT	SNP
Human	C19orf6	422	Hsa56655	TGTTTGTGCTCTTCGTCCTG	GGTCAGCTCTTCCTCCTCCT	SNP
Human	C1QA	336	Hsa58876	CCAAGGCCTTAAAGGAGACC	GCAGATGGGAAGATGAGGAA	SNP
Human	C1RL	870	Hsa56655	ATTGCCCAGAATCAGACGAC	CCAGTCCACATAGCTGAGCA	SNP
Human	C1S	2037	Hsa58876	CCCTTTGAAGAAAAACAGAGGA	CTGCATAGTCTTCATTATCCAGTC	SNP
Human	C3	2756	Hsa56655	CTCCACAATCCAGCCTTCTG	GGACTTCCTGACACCGTCAC	SNP
Human	CBR1	721	Hsa56720	GAGCGTCAGAGCCCTTAAAA	TCACCACTGTTCAACTCTCTTCTC	SNP
Human	CFL1	195	Hsa58876	TGGCTGTCTCTGATGGTGTC	CACCAGATCCTCCTTCTTGC	SNP
Human	CP	1943	Hsa56655	ATCAGCCGGGTCTCACTATG	GGAGCGTAAGACTTGTTTGAGG	SNP
Human	CPT1A	1308	Hsa58876	GTCGTCAGGCCTATTTTGGA	GATTTGGCGTAGCTGTCCAT	SNP
Human	CRP	581	Hsa58876	TCGAGGAAGGCTTTTGTGTT	CTGGGGTTTGGTGAACACTT	NO
Human	CXCL16	999	Hsa58876	ACATGCTTACTCGGGGATTG	TCCTCCTCTTGCACAGCAC	SNP
Human	DUSP1	815	Hsa56720	TCCTGCCCTTTCTGTACCTG	GGAGCTGATGTCTGCCTTGT	SNP
Human	EEF1A1	954	Hsa56655	CCGAGTGGAGACTGGTGTTC	TCCATTGGTGGGTCATTTTT	NO
Rhesus macaque	A2M	3718	17602	CAGAAACCTAAGGCCCCAGT	ATTCTGCTGCTTCGTGATCC	SNP
Rhesus macaque	ABP1	1758	17602	CCAGACACTGCAGATGAAGC	GTGATGGCCTGCTCCTCCT	SNP
Rhesus macaque	ACP5	739	YN05-349	AACTTCCCCAGCCCTTTCTA	TAGGCGGTGACCCTGTATGT	SNP
Rhesus macaque	ACSM2A	416	17550	GTGGTGGGTGAATGGGAAG	AAGATCAGCAGCCACCACTC	SNP
Rhesus macaque	APCS	181	YN05-349	CCTCAGTGGGAAGGTGTTTG	ACCAGGGGTTTGATGATGAC	SNP	sequenced with reverse primer
Rhesus macaque	C6	1181	YN05-349	AGGATCCATAAAGTGATGAAAGTC	TGCTAAACTGATAGAGGAGGTCA	SNP
Rhesus macaque	C8A	1568	17550	AGCCTATTCATGAGGTGCTG	TTCTGTCTGTATTTGCTCACAGG	SNP
Rhesus macaque	CD5L	386	YN06-52	ACCTGGAGTGCGGTTGGT	TGCCCCAGCATCTTCATTAT	SNP	sequenced with reverse primer
Rhesus macaque	CHCHD2	157	17550	ACCTCAGATGAGAGCTGCAC	GCAGGCTCAGCATTACTTCC	SNP	sequenced with reverse primer
Rhesus macaque	COMT	662	17550	GCTACTGGCTGACAACGTGA	CTGCCTGGGCCCTTATAGAT	SNP
Rhesus macaque	CP	881	17602	TCTCCCAGGACTCTCCATGT	TGACAGCTGAGCATCCATTC	SNP
Rhesus macaque	CREB3L3	1273	17602	TCCAGAACTTTGCACAACGA	ACGTCCTGAGCCAGTGCT	SNP
Rhesus macaque	CTSL1	738	17602	GGCTTTTAGCGCTACTGGTG	GAGTCCAGGCCTCCATTGT	SNP
Rhesus macaque	CYC1	233	17550	GTCGAAGTCTGGCCTTTCC	GGTGTGGTCCAAGGAAGAGA	SNP
Rhesus macaque	EEF1A1	553	17602	CTGATTGTTGCTGCTGGTGT	AGCATGTTGTCACCATTCCA	NO
Rhesus macaque	EEF2	2229	YN05-349	GCTGTGTGAGGAGAACATGC	AAGGTAGATGGGCTCCATGA	SNP
BW ruffed lemur	A2M	3903	Vvv4598m	CCAAATATGGAGCAGCCACT	GACACAGCCTTCTCCTGTCA	SNP
BW ruffed lemur	ACSM2A	604	Vvv4598m	CCCTGTGGTGGGTGAGTG	AGCCACCACTCAGGTACTCG	SNP
BW ruffed lemur	ADH1C	751	Vvv4598m	GGGCTCTACCTGTGCTGTGT	CGAAAAATCCACACCTCCAT	NO
BW ruffed lemur	ADRM1	786	Vvv4598m	CCATCCTCCACCACCTCTT	CACGTTCATGGTGGCTAGAA	SNP
BW ruffed lemur	ALB	1535	Vvv586m	CTGAACCGGTTGTGTGTGTT	TCCTTTTCAGGAAGTGTGCAT	SNP
BW ruffed lemur	ALDH2	1026	Vvv4598m	CTTTGCCCTGTTCTTCAACC	TCTTGCTGTCAAAGGGGTTC	SNP
BW ruffed lemur	ARHGEF10L	2490	Vvv586m	GGCCAGGTGGAGATTTTCT	CAGATGGTCGGATGTACCG	NO
BW ruffed lemur	ARPC2	404	Vvv6513m	CCTTGAAAATCTGCCTGCAT	GCCCTGTTCTCTCCTTCCTT	SNP
BW ruffed lemur	BHMT	430	Vvv4598m	GAAGCTGCTTGTGACATTGC	CTGCGATCAAGAAGTCCACA	NO
BW ruffed lemur	CDK9	668	Vvv6513m	CCAAACGTGGACAAGTACGA	CTGGTTGGTAGTGGCAGGAT	SNP
BW ruffed lemur	CES2	236	Vvv6513m	GACTCTGCCAGCCCCATC	CCATCTCTCACACCACTCCA	SNP
BW ruffed lemur	CLTC	3446	Vvv586m	GCAATGCAGTATGCCTCTGA	CTGGATGAAATAGGGCATGG	SNP
BW ruffed lemur	CLU	580	Vvv4598m	CGCCCTTCTACTTCTGGATG	GCGGAGCTGTGGAAGTTG	SNP
BW ruffed lemur	CNN3	1018	Vvv4598m	AGGAATGTTGGCACCAGGTA	TTGGTCGCCATACTGGTATTC	NO
BW ruffed lemur	COPG	1113	Vvv4598m	GCCTGCAACCTGGACCTG	TCCGACATGAAGGACGAGAT	SNP
BW ruffed lemur	CP	307	Vvv1501m	CCTTCAAAATGGCCCAGATA	CCATGTGCATGAAAAGTGTAGG	SNP
BW ruffed lemur	CPS1	2113	Vvv4598m	CTGCCCAGACACTTTCCAAT	GGGACAGTCTGGCATTCACT	SNP
BW ruffed lemur	DDIT4	560	Vvv4598m	CATACCTGGATGGAGTGTCG	GCAGCTGCTCCGAGCTATAC	SNP
BW ruffed lemur	DDX54	1154	Vvv586m	GTGAGCTGCACGCACATCTA	GCGGGGAAGCTGTAGTTGAT	SNP
Coquerel's sifaka	A2M	219	Pvc6108f	TCCCTGCTCCACTCAGAGAC	CGCAGTGGAATAGGTCCTTC	SNP
Coquerel's sifaka	ACAA1	497	Pvc6723f	TGTTTCCAAGCCGAGATTGT	CGTGGTAGAGCCATCCTTCT	SNP	sequenced with reverse primer
Coquerel's sifaka	ACADS	757	Pvc6108f	CATCAGTGCCTTCCTGGTC	CCCCAGGATGTTGTCCTTG	SNP
Coquerel's sifaka	ADH5	742	Pvc597m	CCTGGCTCTACTTGTGCTGTC	GACCTTCACGTTACCGATGC	SNP
Coquerel's sifaka	AGMAT	570	Pvc6399m	GATGCCCACACGGACACT	ATCCGTAGGGATCCAAGGTC	SNP
Coquerel's sifaka	ALAS1	1133	Pvc6399m	CATGCCTCCATGATCCAAG	ATGCAACAATCTTGGGGACT	SNP
Coquerel's sifaka	ALB	361	Pvc597m	TGCTCAGTTGCAAGTCTTCG	CCCAAGAACTTAGATTCATTTTCC	SNP
Coquerel's sifaka	ALDH8A1	810	Pvc6723f	TCCACCAGGTGTGGTCAATA	CGGAATACACTCGTCCAGGT	SNP
Coquerel's sifaka	ALPL	1265	Pvc597m	CAAAGCCAAGCAGGCACT	GTACCCGCCAAAGGTGAAG	SNP
Coquerel's sifaka	AMFR	1183	Pvc6399m	AAGACACCTCCTGTCCAACG	GTGCTGGTTTAGGCGAGGT	NO
Coquerel's sifaka	APCS	250	Pvc6399m	GGTGTTTGTGTTCCCCAGAG	CACACCATAGGTTTGATGACG	SNP
Coquerel's sifaka	APOA1	503	Pvc6723f	CTCCTGGAAAACTGGGACAG	CACTGGGGGTTCAGCTTCT	NO
Coquerel's sifaka	APOE	228	Pvc6723f	AGGCCAAGGTGGAACCAG	GAGCAGCTCCTCCTGCAC	SNP
Coquerel's sifaka	APP	625	Pvc6723f	GCATGACTATGGCATGTTGC	GCCCCACCAGACATCAGAGT	SNP
Coquerel's sifaka	ARSA	1463	Pvc6723f	ACCCACAGCGACACCACT	GTGGCAACAGGCTGGGTAG	SNP
Coquerel's sifaka	ATF5	985	Pvc6723f	TGGCTTCTCTGACTGGATGA	CTCCGAGCCTTGTACACCTC	SNP
Coquerel's sifaka	ATP2A2	2340	Pvc6723f	TGTGAATGATGCTCCTGCTC	CAGACAACTTCCCCCACATT	SNP
Coquerel's sifaka	AURKAIP1	213	Pvc597m	CTCAGGGGTGCTGAACAATC	GTCCTGCCCGGATCTTCC	SNP
Coquerel's sifaka	BAAT	947	Pvc6108f	CAGGCATTGGGGTAGTCTCT	GGAATGAGGTGCTTCCTGAG	SNP
Coquerel's sifaka	BHMT	764	Pvc6723f	CCATTTTGACCCCACGATTA	GCAGATCGATGAATCCCTGT	SNP
Coquerel's sifaka	BTG1	377	Pvc6108f	TCACTGGTTCCCAGAAAAGC	TGTAGTTTTTGGAAGGGCTTG	SNP
Coquerel's sifaka	C14orf68	482	Pvc6108f	CGCTGAGGTGGCTAAGGTG	AGCCACTCGCAGAGGATG	SNP
Coquerel's sifaka	C1QA	635	Pvc597m	GGGGCCTTAAAGGAGACCAG	CAGACGGGAAGATGAGGAAG	SNP
Note: sequence reaction was performed with Forward primer unless noted in comments.
