# Supplementary material for: Comparative RNA sequencing reveals substantial genetic variation in endangered primates
Source: HighWire-hosted journal article supplement (doi:10.1101/gr.130468.111), 2011-12-29
Supplement: SuppTable4.xlsx [file SuppTable4.xlsx]

## Sheet: subsample_het_comparison
Species	Individual	Sites	Total het positions, either subsample	Het positions called in both subsamples	% shared/ total	Removed?
Armadillo	Dno9-29	1416689	1011	829	0.81998
Armadillo	Dno9-35	1425204	1001	816	0.815185
Aye aye	Dm6514m	527322	259	152	0.586873	YES
Aye aye	Dm6262f	572585	964	443	0.459544	YES
Aye aye	Dm6725m	592729	261	215	0.823755
Aye aye	Dm6261f	730814	222	187	0.842342
Black and white ruffed lemur	Vvv6513m	600188	592	477	0.805743
Black and white ruffed lemur	Vvv586m	791888	882	698	0.791383
Black and white ruffed lemur	Vvv4598m	563328	820	644	0.785366
Black and white ruffed lemur	Vvv1501m	512606	712	545	0.765449
Chimpanzee	PtrYN06-108	756114	396	324	0.818182
Chimpanzee	PtrYN05-400	744504	791	656	0.82933
Chimpanzee	PtrYN07-147	577627	345	233	0.675362	YES
Chimpanzee	PtrYN06-147	660613	348	275	0.79023
Crowned lemur	Ec4525f	575771	792	671	0.847222
Crowned lemur	Ec4524f	811077	794	653	0.822418
Crowned lemur	Ec6035m	901868	951	800	0.84122
Crowned lemur	Ec6034m	805652	756	615	0.813492
Moholi bushbaby	Gsm2001f	212828	193	141	0.73057
Moholi bushbaby	Gsm3133f	205030	190	142	0.747368
Moholi bushbaby	Gsm3135m	220685	182	148	0.813187
Moholi bushbaby	Gsm2000m	355185	312	246	0.788462
Human	Hsa58876	836141	345	281	0.814493
Human	Hsa56295	721605	313	249	0.795527
Human	Hsa56655	845415	480	398	0.829167
Human	Hsa56720	474017	236	192	0.813559
Rhesus macaque	Mmu17602	653454	757	610	0.805812
Rhesus macaque	MmuYN05-349	859797	726	606	0.834711
Rhesus macaque	Mmu17550	866681	829	716	0.863691
Rhesus macaque	MmuYN06-52	576344	602	460	0.76412
Common marmoset	Cja18906	662421	343	295	0.860058
Common marmoset	Cja17060	659617	418	350	0.837321
Common marmoset	Cja270-17090	832649	409	334	0.816626
Common marmoset	Cja27565	739228	336	280	0.833333
Mongoose lemur	Em5716m	671485	562	458	0.814947
Mongoose lemur	Em5717f	913120	757	623	0.822985
Mongoose lemur	Em4504m	672715	690	555	0.804348
Mongoose lemur	Em5719f	745930	612	496	0.810458
Mouse	Mouse276016	945854	1381	1117	0.808834
Mouse	Mouse276023	802605	1059	868	0.819641
Mouse	Mouse277160	771717	1005	792	0.78806
Mouse	Mouse276025	1091261	1488	1209	0.8125
Gray short-tailed opossum	MdoL8148	672844	319	270	0.846395
Gray short-tailed opossum	MdoL7013	810872	528	428	0.810606
Gray short-tailed opossum	MdoL4394	869458	489	411	0.840491
Gray short-tailed opossum	MdoL9211	1020636	584	496	0.849315
Coquerel's sifaka	Pvc597m	605043	1470	1179	0.802041
Coquerel's sifaka	Pvc6399m	794952	2029	1712	0.843765
Coquerel's sifaka	Pvc6723f	694322	1748	1335	0.76373
Coquerel's sifaka	Pvc6108f	749718	1592	1229	0.771985
Slow loris	Nc1960m	633822	557	434	0.779174
Slow loris	Nc1949m	518015	487	398	0.817248
Slow loris	Nc1972f	673829	577	478	0.828423
Slow loris	Nc961m	769367	499	384	0.769539
Northern tree shrew	TbeM8182	968467	1732	1433	0.827367
Northern tree shrew	TbeF7498	1515474	2813	2305	0.81941
Northern tree shrew	TbeM8174	1048430	2083	1645	0.789726
Northern tree shrew	TbeM8002	1391126	2411	2020	0.837827
Vervet	Cae06815	579348	512	429	0.837891
Vervet	Cae09168	651551	656	536	0.817073
Vervet	Cae06789	684058	606	484	0.79868
Vervet	Cae06471	761724	581	485	0.834768
