# Supplementary material for: Comparative RNA sequencing reveals substantial genetic variation in endangered primates
Source: HighWire-hosted journal article supplement (doi:10.1101/gr.130468.111), 2011-12-29
Supplement: SuppTable5.xlsx [file SuppTable5.xlsx]

## Sheet: Sheet1
lineage	Gene	Nonsynonymous sites	Synonymous sites	Nonsynonymous substitutions	Synonymous substitutions	dN	dS	dN.dS	dNdSgenome
ancestral hominid	BAAT	739.2	307.8	20.5	6.9	0.0278	0.0223	1.2478	1.17652
ancestral hominid	C11orf24	474.3	275.7	9.9	1.5	0.0208	0.0054	3.8251	0.880274
ancestral hominid	GIMAP4	691.2	250.8	27.1	9.2	0.0392	0.0368	1.0663	1.65898
ancestral hominid	HLA-DMB	510	177	14.8	4.7	0.0289	0.0264	1.0937	1.22307
ancestral hominid	LRPPRC	2266.9	811.1	81.1	21.6	0.0358	0.0266	1.3422	1.51509
ancestral hominid	MGMT	399.9	161.1	10.5	0.9	0.0261	0.0055	4.781	1.10457
ancestral hominid	MRPS31	493.5	172.5	12.9	2.5	0.0261	0.0146	1.7811	1.10457
human	AVEN	487.6	202.4	3	0	0.0063	0	999	1.05749
human	C11orf24	474.3	275.7	3.1	1.1	0.0064	0.0039	1.6556	1.07428
human	C3orf1	470.8	174.2	3	1	0.0064	0.0057	1.119	1.07428
human	CASC4	565.1	214.9	4.1	0.9	0.0072	0.0043	1.6718	1.20856
human	CCT8	1162.9	427.1	12	5.5	0.0103	0.0128	0.803	1.72892
human	CHPT1	541.5	211.5	3.9	1.1	0.0073	0.0052	1.4111	1.22535
human	CYB5R3	712.4	166.6	9.2	4.3	0.0129	0.0261	0.4949	2.16534
human	FCGR3A	484	167	3.8	0	0.0079	0	999	1.32606
human	IRF9	530.5	198.5	4.1	1	0.0077	0.0052	1.4823	1.29249
human	LHPP	447.6	167.4	3	0	0.0067	0	999	1.12464
human	LTBR	549.1	161.9	5.2	4.1	0.0094	0.0253	0.3716	1.57785
human	NAAA	580.4	214.6	4.1	1.1	0.007	0.0051	1.3724	1.17499
human	NAT2	618.4	218.6	6.6	3.3	0.0107	0.015	0.7116	1.79606
human	NGRN	440.5	168.5	4.1	2	0.0093	0.012	0.7817	1.56106
human	OBFC1	383.6	156.4	3.1	0	0.008	0	999	1.34285
human	PBXIP1	1360.1	481.9	8.4	0.9	0.0062	0.0019	3.2435	1.04071
human	PSMF1	550.6	223.4	4.1	1	0.0074	0.0045	1.6253	1.24213
human	TMEM176B	516.9	206.1	3.2	0	0.0061	0	999	1.02392
human	UGT3A1	1089.2	476.8	12.8	5.6	0.0118	0.0118	0.9929	1.9807
human	ZNF408	643.3	286.7	4	0	0.0063	0	999	1.05749
chimpanzee	AHSG	578.5	246.5	5.6	0	0.0097	0	999	1.70328
chimpanzee	ANKS4B	616.6	229.4	4	0	0.0066	0	999	1.15893
chimpanzee	AQP9	351.1	167.9	4.1	2.1	0.0116	0.0126	0.926	2.03691
chimpanzee	BAAT	739.2	307.8	4.9	0	0.0066	0	999	1.15893
chimpanzee	C1orf63	455.8	171.2	4.1	2.7	0.009	0.0159	0.5696	1.58036
chimpanzee	COQ9	619.7	226.3	4	0	0.0065	0	999	1.14137
chimpanzee	CRP	473	169	3.1	1	0.0065	0.0061	1.0737	1.14137
chimpanzee	CYP2J2	554.1	207.9	3.3	1.1	0.0059	0.0051	1.1568	1.03602
chimpanzee	FCGR3A	484	167	3.7	0	0.0076	0	999	1.33453
chimpanzee	HRG	532.4	205.6	8	0	0.015	0	999	2.63394
chimpanzee	HSD17B13	540.8	215.2	3.9	0	0.0072	0	777.686	1.26429
chimpanzee	IFIT1	881	328	6.3	1.6	0.0071	0.0049	1.4635	1.24673
chimpanzee	NAT2	618.4	218.6	3.7	1	0.0059	0.0046	1.2987	1.03602
chimpanzee	QDPR	492.2	176.8	3.2	0	0.0064	0	999	1.12381
chimpanzee	STBD1	427.2	172.8	3	1	0.0071	0.0059	1.1965	1.24673
chimpanzee	TRIM52	425.2	174.8	5.3	3	0.0124	0.0174	0.7119	2.17739
chimpanzee	ZNF622	669.8	227.2	5	1	0.0075	0.0046	1.6278	1.31697
ancestral old world monkey	MARCO	574.4	301.6	19.8	7.3	0.0346	0.0244	1.4179	1.31164
ancestral old world monkey	SMUG1	424.2	193.8	5.1	1.1	0.012	0.0055	2.1801	0.454905
rhesus macaque	ATP5F1	483.8	182.2	9.8	3.3	0.0203	0.018	1.1266	2.00885
rhesus macaque	C3orf1	470.8	174.2	5.6	2.1	0.012	0.0119	1.0037	1.1875
rhesus macaque	CEACAM1	743.8	270.2	12.1	4.9	0.0163	0.018	0.9051	1.61302
rhesus macaque	CYC1	580.9	196.1	7.1	2	0.0123	0.0102	1.2108	1.21719
rhesus macaque	HPS4	1053.8	434.2	16.2	0.9	0.0153	0.0022	7.0357	1.51406
rhesus macaque	HRG	532.4	205.6	5.9	0	0.0111	0	999	1.09844
rhesus macaque	MLKL	711.8	266.2	7.8	1.7	0.011	0.0062	1.7642	1.08854
rhesus macaque	NDUFA9	637.7	256.3	14.4	2	0.0226	0.0079	2.8704	2.23646
rhesus macaque	OXA1L	702.9	299.1	6.8	1	0.0096	0.0034	2.857	0.95
rhesus macaque	PECR	463.9	166.1	5.1	0	0.0111	0	999	1.09844
rhesus macaque	SERPINA10	895.1	346.9	10.4	0	0.0116	0	999	1.14792
rhesus macaque	TFB2M	576.2	197.8	9	1.9	0.0157	0.0098	1.5911	1.55365
rhesus macaque	TRUB2	467.1	165.9	5.1	1.7	0.0109	0.0105	1.0372	1.07865
rhesus macaque	VNN1	1036.3	409.7	12.7	4	0.0122	0.0098	1.2519	1.20729
rhesus macaque	XPC	729.3	293.7	7.6	0	0.0104	0	999	1.02917
vervet	C3orf1	470.8	174.2	7.6	1	0.0162	0.0059	2.7456	1.42467
vervet	CEACAM1	743.8	270.2	12.3	4.3	0.0165	0.016	1.0342	1.45105
vervet	GHDC	1087.8	412.2	7.5	1.3	0.0069	0.0032	2.1729	0.606802
vervet	GNL3L	1189.7	433.3	8.2	1	0.0069	0.0023	3.0271	0.606802
vervet	HRG	532.4	205.6	6.2	1	0.0117	0.0049	2.3653	1.02893
vervet	MRPL22	428.7	165.3	5.1	1	0.0119	0.0062	1.9237	1.04651
vervet	PGLYRP2	750.9	323.1	13.9	7.9	0.0185	0.0246	0.753	1.62693
ancestral lemur	AHSG	578.5	246.5	8.3	3.3	0.0144	0.0134	1.0721	1.09966
ancestral lemur	APOF	370	155	7.5	0	0.0202	0	999	1.54257
ancestral lemur	APOH	739.2	280.8	19.9	15.2	0.027	0.0541	0.4984	2.06185
ancestral lemur	C1orf85	611.7	249.3	7.8	1.2	0.0128	0.0047	2.7493	0.977472
ancestral lemur	CD47	452.2	168.8	11.7	4.9	0.0259	0.029	0.8933	1.97785
ancestral lemur	CD5L	551.9	210.1	10	2	0.0181	0.0093	1.944	1.38221
ancestral lemur	CECR1	840	294	14	4.7	0.0166	0.0161	1.0363	1.26766
ancestral lemur	DNTTIP2	837.7	263.3	7.2	1	0.0086	0.004	2.1508	0.656739
ancestral lemur	FCGR3A	484	167	7.6	0	0.0157	0.0003	57.1804	1.19893
ancestral lemur	GGH	569.8	195.2	10	1.4	0.0176	0.007	2.5241	1.34402
ancestral lemur	GPLD1	1440.7	542.3	7.3	1.1	0.0051	0.002	2.5582	0.389461
ancestral lemur	HACL1	804	324	5	1	0.0062	0.003	2.1061	0.473463
ancestral lemur	MLKL	711.8	266.2	22.2	0	0.0312	0	999	2.38259
ancestral lemur	PARP9	518	190	7.9	2	0.0152	0.0107	1.4185	1.16075
ancestral lemur	PHYH	670.5	223.5	14.1	0	0.021	0	999	1.60366
ancestral lemur	PLA2G7	794.6	255.4	18	1.6	0.0227	0.0061	3.6981	1.73349
ancestral lemur	PLSCR1	585.3	179.7	7.9	0	0.0135	0.0001	160.816	1.03093
ancestral lemur	PNPLA3	727.8	241.2	25.9	5.4	0.0356	0.0225	1.5844	2.71859
ancestral lemur	SLC16A1	714.2	290.8	28.8	19.9	0.0403	0.0684	0.5899	3.07751
ancestral lemur	SLC17A3	491.1	204.9	44.3	12.3	0.0903	0.06	1.504	6.89576
ancestral lemur	SLC46A3	768.9	290.1	7.7	1.2	0.0101	0.0041	2.4415	0.771286
ancestral lemur	SULT1E1	642.4	218.6	18.3	15.3	0.0285	0.0699	0.4077	2.1764
ancestral lemur	VCAM1	1192.6	460.4	17.1	5.4	0.0144	0.0118	1.215	1.09966
aye-aye	C11orf24	474.3	275.7	41.5	18.7	0.0875	0.068	1.2869	1.6689
aye-aye	FOXRED1	582	231	6.5	1.2	0.0111	0.0052	2.1165	0.211712
ancestral treeshrew+primate	ANPEP	1401.5	320.5	33.6	23.6	0.0239	0.0735	0.3257	2.23518
ancestral treeshrew+primate	AQP11	430.8	157.2	7.8	0	0.018	0	999	1.6834
ancestral treeshrew+primate	C21orf91	429.4	155.6	5.3	0	0.0124	0	999	1.15968
ancestral treeshrew+primate	CCS	389.3	159.7	4.5	0	0.0115	0	999	1.07551
ancestral treeshrew+primate	CDH5	1087	338	18.2	2.5	0.0167	0.0074	2.2726	1.56182
ancestral treeshrew+primate	CTSC	914.1	315.9	11.8	0	0.013	0	999	1.21579
ancestral treeshrew+primate	EPHX1	886.9	220.1	14.3	7.3	0.0162	0.0332	0.4875	1.51506
ancestral treeshrew+primate	GGH	569.8	195.2	8.6	0	0.0152	0	999	1.42154
ancestral treeshrew+primate	HEXB	831.3	272.7	13	0	0.0157	0	999	1.4683
ancestral treeshrew+primate	MPEG1	984	354	11	0	0.0112	0	999	1.04745
ancestral treeshrew+primate	MXI1	464	172	8.7	7	0.0187	0.0407	0.4594	1.74887
ancestral treeshrew+primate	PTCD3	1056.9	389.1	6.8	1.1	0.0065	0.0029	2.2466	0.607895
ancestral treeshrew+primate	RHBDD1	423.1	176.9	4.6	0	0.011	0	999	1.02875
ancestral treeshrew+primate	SIRT5	412.8	160.2	7.1	2	0.0172	0.0127	1.3558	1.60858
ancestral eulemur+BW ruffed+sifaka	AZGP1	536.6	168.4	11.8	1	0.0221	0.0059	3.7708	0.669016
ancestral eulemur+BW ruffed+sifaka	CD47	452.2	168.8	18	6.5	0.0399	0.0385	1.0348	1.20786
ancestral eulemur+BW ruffed+sifaka	CD5L	551.9	210.1	26.4	8.5	0.0479	0.0404	1.1858	1.45004
ancestral eulemur+BW ruffed+sifaka	CPOX	715.1	247.9	12.2	1.3	0.0171	0.0052	3.2818	0.517655
ancestral eulemur+BW ruffed+sifaka	F9	1022.3	330.7	10.5	1.1	0.0103	0.0035	2.9767	0.311804
ancestral eulemur+BW ruffed+sifaka	HABP2	1230.2	395.8	62	34.5	0.0504	0.0871	0.5785	1.52572
ancestral eulemur+BW ruffed+sifaka	HIBCH	766.1	250.9	6.8	1.1	0.0088	0.0043	2.0517	0.266395
ancestral eulemur+BW ruffed+sifaka	PARP9	518	190	12.3	1.1	0.0238	0.0059	4.028	0.720479
ancestral eulemur+BW ruffed+sifaka	TNFSF10	558.8	197.2	20.7	0.5	0.0371	0.0027	13.9705	1.1231
crowned lemur	APOF	370	155	3.1	0	0.0084	0	999	1.1636
crowned lemur	GLYAT	553.5	208.5	7.3	2.2	0.0133	0.0106	1.2533	1.84236
mongoose lemur	ALDH1A1	680.2	252.8	11.3	4.8	0.0166	0.0192	0.8656	2.2918
mongoose lemur	APOM	403.9	154.1	3	0	0.0075	0	999	1.03545
mongoose lemur	C1orf55	537.1	221.9	3.9	1	0.0073	0.0044	1.6404	1.00784
mongoose lemur	CYP2J2	554.1	207.9	5.9	1.1	0.0107	0.0054	1.9814	1.47725
mongoose lemur	GLYAT	553.5	208.5	8	6.2	0.0145	0.0299	0.4851	2.00188
mongoose lemur	HMGCL	413.4	165.6	3	0	0.0073	0	999	1.00784
mongoose lemur	MAPRE2	643.9	232.1	10.2	5.1	0.0159	0.022	0.7229	2.19516
mongoose lemur	MAVS	553.4	274.6	5.6	2.1	0.0102	0.0076	1.34	1.40822
mongoose lemur	MTERFD2	359.5	159.5	4.1	1	0.0115	0.0062	1.8516	1.58769
mongoose lemur	R3HCC1	562.3	214.7	5.2	1	0.0092	0.0048	1.9342	1.27016
sifaka	BAG1	464.5	186.5	5.2	1	0.0112	0.0051	2.1792	0.274823
sifaka	C1orf63	455.8	171.2	22.1	1.7	0.0485	0.0097	5.0068	1.19008
sifaka	GIMAP4	691.2	250.8	19.5	3.5	0.0282	0.0139	2.0366	0.691964
sifaka	PEX11A	385.7	163.3	11.4	2	0.0295	0.0124	2.3727	0.723863
sifaka	PHF11	727.5	250.5	42.7	8.4	0.0586	0.0336	1.7463	1.43791
ancestral primate	CD47	452.2	168.8	20.3	6.3	0.0449	0.037	1.2123	2.40422
ancestral primate	EHHADH	532.4	232.6	7	1.3	0.0131	0.0055	2.3609	0.701453
ancestral primate	FASTKD2	1070.6	414.4	18	3.4	0.0169	0.0082	2.0455	0.904928
ancestral primate	GGH	569.8	195.2	26.1	1.8	0.0459	0.0094	4.8663	2.45776
ancestral primate	IFIH1	1537.8	541.2	15.2	2.4	0.0099	0.0044	2.2696	0.530106
ancestral primate	IL4R	875.3	225.7	18.7	0	0.0213	0	995.242	1.14053
ancestral primate	LASS5	685	263	10.4	1.6	0.0152	0.006	2.5607	0.8139
ancestral primate	PECI	580.3	223.7	7.2	1.4	0.0123	0.0061	2.0285	0.658616
ancestral primate	TFB2M	576.2	197.8	13	2.3	0.0226	0.0115	1.9563	1.21014
ancestral anthropoid	AZGP1	536.6	168.4	51.1	12.1	0.0953	0.0721	1.3217	1.37385
ancestral anthropoid	C11orf24	474.3	275.7	51.4	32.5	0.1083	0.118	0.9176	1.56126
ancestral catarrhine	AZGP1	536.6	168.4	25.7	0	0.0479	0	999	2.13225
ancestral catarrhine	CEACAM1	743.8	270.2	24.9	5.8	0.0334	0.0213	1.5687	1.48679
ancestral catarrhine	FMO3	961.6	355.4	9.6	1.8	0.01	0.0049	2.0217	0.445146
ancestral catarrhine	GIMAP4	691.2	250.8	26.3	10.6	0.0381	0.0422	0.9016	1.69601
ancestral catarrhine	GLYAT	553.5	208.5	13	3.2	0.0234	0.0152	1.539	1.04164
ancestral catarrhine	MAVS	553.4	274.6	18.4	0.7	0.0332	0.0025	13.4608	1.47789
ancestral catarrhine	MOCOS	1331.9	519.1	13.4	1.7	0.0101	0.0032	3.1186	0.449598
ancestral catarrhine	SERPINA3	939	276	32.5	13.5	0.0346	0.0488	0.7086	1.54021
ancestral catarrhine	SFXN4	662.6	276.4	34.7	7.5	0.0524	0.0272	1.9254	2.33257
ancestral catarrhine	STBD1	427.2	172.8	5.7	1.1	0.0132	0.0063	2.1057	0.587593
ancestral catarrhine	TFB2M	576.2	197.8	30.2	9.4	0.0524	0.0476	1.101	2.33257
ancestral catarrhine	TMEM173	689.4	225.6	17.1	3.2	0.0247	0.0141	1.7547	1.09951
ancestral catarrhine	TMEM176B	516.9	206.1	22.3	6.3	0.0431	0.0304	1.4177	1.91858
ancestral catarrhine	UPP1	573.5	206.5	13.3	1.9	0.0233	0.0091	2.5481	1.03719
marmoset	C11orf24	474.3	275.7	42.8	21	0.0903	0.0763	1.1833	1.29608
marmoset	PTPRJ	912.9	359.1	100.4	26.6	0.11	0.0742	1.4831	1.57884
marmoset	SFXN4	662.6	276.4	68.3	19.7	0.103	0.0714	1.4437	1.47837
ancestral strepsirrhine	APOF	370	155	14.5	3.4	0.0392	0.0217	1.8075	1.14138
ancestral strepsirrhine	CPB2	582.4	200.6	33.3	8.3	0.0571	0.0416	1.3738	1.66257
ancestral strepsirrhine	STBD1	427.2	172.8	13.6	2.5	0.0318	0.0145	2.1953	0.925913
ancestral strepsirrhine	VWA5A	776.6	291.4	17.6	2.6	0.0226	0.0088	2.5581	0.658039
bushbaby	GPR172B	310.9	157.1	11.9	1.5	0.0382	0.0096	3.9623	0.818871
slow loris	ZNF830	550.4	241.6	12	2.4	0.0218	0.01	2.1785	0.52404
black white ruffed lemur	CES1	870.4	320.6	12.8	1.5	0.0147	0.0045	3.227	0.648073
black white ruffed lemur	CYP4F3	790	224	32.5	6.5	0.0412	0.0289	1.4277	1.81637
black white ruffed lemur	HEXB	831.3	272.7	8.4	1	0.0101	0.0037	2.7656	0.445275
black white ruffed lemur	IFIT1	881	328	25.6	8.2	0.0291	0.0249	1.1669	1.28292
black white ruffed lemur	PLA1A	804.3	305.7	21.4	6.1	0.0267	0.0199	1.3407	1.17711
black white ruffed lemur	TFB1M	509.8	213.2	5.6	1	0.0109	0.0049	2.242	0.480544
ancestral eulemur+BW ruffed	ARMCX6	480.5	179.5	7.2	1.2	0.015	0.0066	2.2668	0.779517
ancestral eulemur+BW ruffed	ATP5F1	483.8	182.2	6.5	1.1	0.0134	0.0058	2.2846	0.696368
ancestral eulemur+BW ruffed	CCNDBP1	473	202	6.3	1	0.0134	0.0052	2.5916	0.696368
ancestral eulemur+BW ruffed	CD47	452.2	168.8	12.7	4.7	0.0282	0.0281	1.0026	1.46549
ancestral eulemur+BW ruffed	CYBRD1	451	194	9.2	3.1	0.0205	0.0159	1.2861	1.06534
ancestral eulemur+BW ruffed	FMO5	1151.9	435.1	14.5	1.2	0.0126	0.0028	4.565	0.654794
ancestral eulemur+BW ruffed	GGH	569.8	195.2	7.4	1.1	0.013	0.0057	2.2733	0.675581
ancestral eulemur+BW ruffed	HTATSF1	854.8	282.2	18.7	5.6	0.0219	0.0197	1.112	1.13809
ancestral eulemur+BW ruffed	LBP	897.8	305.2	20.2	6.7	0.0225	0.022	1.0212	1.16928
ancestral eulemur+BW ruffed	MRPS31	493.5	172.5	9.5	2.6	0.0193	0.0148	1.3066	1.00298
ancestral eulemur+BW ruffed	OBFC1	383.6	156.4	9.6	0.6	0.0251	0.0041	6.1258	1.30439
ancestral eulemur+BW ruffed	PHYH	670.5	223.5	24.9	8.3	0.0372	0.037	1.0043	1.9332
ancestral eulemur+BW ruffed	PIPOX	760.1	292.9	14.7	5.3	0.0193	0.018	1.0695	1.00298
ancestral eulemur+BW ruffed	SERPING1	809.9	261.1	10.7	1.4	0.0132	0.0052	2.5336	0.685975
ancestral eulemur+BW ruffed	VSIG4	388.7	154.3	6.5	1	0.0166	0.0063	2.6503	0.862665
ancestral eulemur	AVEN	487.6	202.4	10.5	3.4	0.0215	0.0168	1.2765	1.0876
ancestral eulemur	C1orf55	537.1	221.9	16.6	13.7	0.0309	0.0619	0.4983	1.56312
ancestral eulemur	C4orf19	518.9	219.1	17.4	11.3	0.0334	0.0514	0.6504	1.68958
ancestral eulemur	C9orf142	353.7	150.3	4.8	1	0.0135	0.0065	2.0703	0.682915
ancestral eulemur	CCNDBP1	473	202	14.6	3.1	0.0309	0.0151	2.0437	1.56312
ancestral eulemur	CYBRD1	451	194	7	1	0.0155	0.0052	2.9921	0.784087
ancestral eulemur	ECHS1	467.3	171.7	9.9	2	0.0212	0.0118	1.7977	1.07243
ancestral eulemur	GPKOW	1004.6	387.4	13.7	1.8	0.0136	0.0048	2.854	0.687973
ancestral eulemur	HSD17B11	645.8	242.2	27.8	13.6	0.043	0.0563	0.7635	2.17521
ancestral eulemur	PHYH	670.5	223.5	20.5	4.7	0.0305	0.0211	1.4479	1.54288
ancestral eulemur	RHBDD1	423.1	176.9	4.9	1	0.0117	0.0057	2.0378	0.591859
ancestral eulemur	SERPINA7	639.8	257.2	6.1	1	0.0096	0.0041	2.3609	0.485628
