# Supplementary material for: Comparative RNA sequencing reveals substantial genetic variation in endangered primates
Source: HighWire-hosted journal article supplement (doi:10.1101/gr.130468.111), 2011-12-29
Supplement: SuppTable6.xlsx [file SuppTable6.xlsx]

## Sheet: Sheet1
Lineage	gene	Likelihood ratio values (NA indicates that assembled gene sequence was not available for that species)
		human	chimp	ancestral hominid	macaque	vervet	ancestral old world monkey	ancestral catarrhine	marmoset	ancestral anthropoid	slowloris	mongoose lemur	crowned lemur	ancestral eulemur	black and white ruffed lemur	ancestral eulemur + BW ruffed	sifaka	ancestral eulemur + BW ruffed + sifaka	aye-aye	ancestral lemur	ancestral strepsirrhine	ancestral primate
Human	ACO2	36.0334	1.51268	1.1541	1.00869	1.03858	1.07949	1.00766	1.26654	1.14733	1.45599	1.35155	1.08595	1.04659	1.26806	1.05901	1.37047	1.07043	1.01849	1.07027	1.10031	1.24513
Human	BAMBI	15.2574	4.6779	1.26778	NA	1.27434	1.09081	1.2621	1.68486	1.18678	2.21411	1.07074	NA	1.31748	1.1954	1.20854	1.10014	1.04316	1.08901	1.17535	1.09898	1.55777
Human	BRI3BP	61.2688	2.74154	1.00002	1.01127	1.48952	1.00178	1.28203	1.0639	1.11997	1.51481	1.00061	NA	0.999984	NA	1.00021	NA	1.0006	1.56825	1.0269	1.04907	1.49584
Human	CCL14	25.0901	2.46296	1.01987	NA	NA	NA	1.02024	1.32665	1.08192	NA	NA	1.01437	1.01437	1.99285	1.03147	NA	1.03179	1.47176	1.22143	1.22142	1.00006
Human	CFL2	14.2793	2.43217	1.13444	1.0007	1.19863	1.09444	1.13595	1.70018	1.2418	1.759	1.02605	0.999993	1.37239	1.1764	1.20768	1.07884	1.0911	1.10986	1.51721	2.19166	1.16952
Human	CYTH1	39.1471	1.71234	1.10192	1.28186	NA	1.28178	1.24739	1.04047	1.00077	NA	NA	1.0076	1.00831	1.00567	1.19315	1.01441	1.00381	1.65355	1.00002	1.00002	1.5032
Human	DHRS4	40.0179	3.851	1.12504	1.01487	2.94042	3.30121	2.37629	1.32786	1.08509	NA	1.02424	NA	1.07098	NA	1.0463	2.14755	1.03916	1.00508	1.04941	1.07358	1.40043
Human	DUSP6	82.2164	1.84016	1.17647	1.00356	1.26531	1.10571	1.04944	1.4852	1.00408	NA	1.13473	1.27509	1.42974	1.2523	1.18298	1.21113	1.06423	NA	1.04094	1.06058	1.23461
Human	EML4	317.708	1.24176	3.22309	1.00806	1.38789	1.0077	1.04279	1.01335	1.1467	NA	NA	1.00895	1.00895	NA	1.00895	1.11519	1.06806	NA	1.04328	1.06417	1.51378
Human	EMP1	23.6569	2.42831	1.03969	NA	1.14269	1.05453	1.15975	NA	1.11315	1.56106	NA	NA	NA	1.12259	1.10331	NA	1.05754	NA	1.03679	1.06664	1.34954
Human	GPR125	105.873	1.70641	1.31247	NA	1.67498	1.67499	1.22636	0.999918	1.04502	NA	NA	NA	NA	NA	NA	1.02973	1.01404	NA	1.00951	1.01337	1.45696
Human	GSTT1	139.387	1.80584	1.25481	1.24435	3.78244	1.04494	1.03636	1.37853	1.09542	1.08117	1.03443	NA	1.1297	NA	1.07084	NA	1.04034	NA	1.02605	1.06692	1.38254
Human	INMT	11.081	1.13384	1.06439	1.00513	1.46753	1.01813	1.17175	1.16908	1.07973	NA	NA	NA	NA	NA	NA	NA	NA	NA	NA	NA	1.33449
Human	INPP1	44.885	1.14465	1.76834	1.49793	1.49016	1.75818	1.17181	NA	1.12116	NA	3.21489	1.54331	1.0334	1.1463	1.08895	NA	1.05	NA	1.0321	1.04721	1.41739
Human	IRF8	15.8249	3.8347	1.28964	1.01485	1.41985	1.11569	1.28082	1.69186	1.16958	NA	NA	NA	NA	NA	NA	1.20048	1.0617	1.53333	1.04867	1.07243	1.48901
Human	KLF10	140.683	2.55652	1.10623	1.01302	1.45613	1.18026	1.27391	1.71807	1.18118	1.08031	1.057	1.4317	1.02375	1.03464	1.21849	1.37032	1.12487	1.53631	1.07143	1.08664	1.54503
Human	LRWD1	10.3055	1.23706	1.03672	1.00598	NA	1.05193	1.07244	NA	1.05494	NA	NA	NA	NA	1.16501	1.13782	1.17401	1.09005	1.57195	1.05027	1.07492	1.29596
Human	MCL1	1161.62	1.62722	2.82941	1.00685	1.03127	1.45294	1.22624	1.28274	1.17707	NA	NA	NA	NA	1.1676	1.13991	1.26872	1.10323	1.09137	1.03667	1.0539	1.27621
Human	MEAF6	30.1097	0.999998	3.05998	2.69148	1.22938	1.41415	1.20219	1.55256	1.18445	1.00286	1.00961	0.999992	1.40807	1.08685	1.0036	1.34604	1.05353	1.72303	1.03983	1.10059	1.57395
Human	MGAT1	31.1114	1.52719	1.10976	1.01413	1.40604	1.07744	4.12571	1.54149	2.55072	1.07182	1.00008	1.2418	1.0833	1.14465	2.76022	1.03665	1.0051	1.74945	1.03914	1.09888	1.07904
Human	PRMT6	15.1187	1.40627	1.04372	NA	3.1323	3.13237	1.03854	NA	1.03888	NA	1.13833	1.43565	1.11818	1.24651	1.01755	1.22279	1.05088	NA	1.03265	1.04804	1.20786
Human	RAB13	10.278	2.39772	1.21178	1.00945	1.37603	1.11934	1.00561	1.35631	1.13114	1.1549	1.02747	1.04353	1.43579	1.02595	1.08739	1.30433	1.32468	1.20993	1.0698	1.02441	1.40483
Human	RBM8A	22.8477	3.49644	1.17788	1.00989	1.29024	1.01499	1.08096	1.55369	0.999984	1.00879	1.06903	1.42864	1.01586	1.06954	1.18431	1.00224	1.08393	1.19099	1.07619	1.04359	1.49797
Human	RND3	10.3113	1.71021	1.03812	1.01378	1.44501	1.08214	1.27094	1.06198	1.12582	1.32628	1.11355	1.427	1.22763	1.21995	1.01121	1.36995	1.00419	1.70945	1.0016	1.29876	1.49585
Human	RPL3	14.9653	1.41044	1.02369	1.07204	1.42952	1.10967	1.00714	1.68854	1.00221	1.78389	1.04391	1.5211	1.28832	1.01619	1.16572	1.00001	1.0901	1.33436	1.07607	1.0976	1.00349
Human	SERTAD1	38.1132	2.0733	1.00515	1.01029	1.16452	1.06256	1.25163	1.70875	1.15709	1.57011	NA	1.1397	1.24429	1.02281	1.08657	NA	1.0497	1.56868	1.02503	1.06769	1.50921
Human	SREBF2	12.3884	1.80637	1.03335	1.01464	1.03144	1.00212	1.18971	NA	1.13289	NA	1.07674	1.42301	1.0149	1.12057	1.19001	1.04748	1.01417	1.06999	1.04919	1.07325	1.51749
Human	STRN3	12.1802	2.50219	1.1607	NA	1.12033	1.04882	1.24685	1.04857	1.02838	NA	NA	NA	NA	NA	NA	NA	NA	1.35269	1.03914	1.05787	1.002
Human	STX4	84.7385	1.3999	1.61253	1.57633	1.49282	1.72636	1.20513	NA	1.14286	1.01686	1.08049	NA	1.3845	1.00596	1.0032	1.05407	1.59489	1.16198	1.05355	1.08709	1.36196
Human	SUPT6H	17.0786	1.31083	1.12604	1.00819	NA	1.07434	0.999969	1.01584	1.16314	1.60335	1.16314	1.44198	1.35807	1.12959	1.0019	1.26044	1.05735	NA	1.03695	1.01915	1.13305
Human	SURF4	13.1933	1.02325	1.47289	1.23267	1.28376	2.83158	1.08285	1.05253	1.151	NA	1.02979	1.02684	1.20684	1.2167	1.08918	NA	1.05019	NA	1.03223	1.04739	1.3193
Human	TBCA	941.975	2.51504	1.82048	1.01319	1.80981	3.72436	1.09653	1.16326	1.07622	1.05878	1.09142	1.44375	1.01972	1.26913	1.04144	1.16712	1.10285	1.55677	1.07317	1.04085	1.60267
Human	TOMM7	31.0352	2.31217	1.00122	1.02862	2.4533	1.01868	1.29906	1.51986	1.164	1.8298	1.17892	1.43383	1.45048	1.11283	1.10104	1.30526	1.11135	1.40401	1.03259	1.04364	1.37646
Human	TRIB1	75.8046	1.00266	4.72887	1.01051	1.0156	1.69456	1.10432	NA	1.07703	1.19509	NA	1.03412	1.0371	1.23948	1.07114	1.00712	1.08727	NA	1.05495	1.0712	1.45684
Human	VAMP5	39.4141	1.50963	1.18023	1.00808	1.41315	1.00165	1.24456	1.1421	1.18246	1.00015	1.16002	1.06783	1.11456	1.50886	1.17582	1.13799	1.39578	1.51352	1.08872	1.06216	1.37553
Marmoset	ARL2	1.32582	1.38148	1.69599	1.01354	1.0001	1.05318	1.03547	17.1582	1.09499	1.69729	1.02246	4.19057	1.5689	1.2311	1.20838	0.999977	1.01079	1.00242	2.23779	1.05212	1.13175
Marmoset	ATP6V1B2	1.32314	1.01871	1.30532	1.00012	1.17594	1.10128	4.55071	78.6197	1.12789	0.999931	1.07303	NA	1.3329	1.24866	1.15388	1.24084	1.12487	1.71771	1.07569	1.01085	1.33706
Marmoset	C11orf67	NA	1.03296	1.08154	1.0109	1.27946	1.00675	3.37449	21.2646	1.14298	1.23596	1.04917	0.999978	1.30176	1.14428	1.00372	NA	1.0038	NA	1.0038	1.07433	1.51713
Marmoset	C14orf149	1.13014	NA	1.17635	2.18792	NA	2.18791	1.90226	10.6928	1.10843	NA	NA	1.07893	1.12784	NA	1.07088	1.26202	1.03178	1.48326	1.04089	1.06046	1.51181
Marmoset	C21orf2	NA	1.0725	1.26288	1.25106	2.36199	1.084	1.24776	19.2151	4.03299	NA	1.15428	1.01443	1.15851	2.48048	1.18293	0.999989	1.08662	1.11497	1.01761	1.02458	1.84211
Marmoset	CCDC104	NA	1.06003	1.20333	1.01462	0.999977	1.00002	1.83316	83.872	1.00622	NA	NA	NA	NA	1.06207	1.05374	NA	1.03177	1.38126	1.04802	1.07144	1.00061
Marmoset	CCDC47	1.31468	1.13936	1.28544	1.06666	NA	1.06664	1.62525	62.2824	1.01539	1.70819	1.16434	1.08701	1.20121	1.0529	1.15604	NA	1.08423	1.28067	1.03005	1.06035	1.24556
Marmoset	CDC26	1.1727	1.10507	1.36388	1.00618	1.87229	1.01392	1.12018	33.5475	1.11319	1.02361	NA	1.1581	1.28254	1.15245	1.30363	NA	1.30371	1.173	2.28341	1.11945	1.58206
Marmoset	CYGB	NA	NA	NA	1.00041	1.2445	2.67185	2.67162	40915	1.92957	1.38983	1.03246	NA	1.08778	1.24095	1.05183	NA	1.03231	1.01296	1.28002	1.03185	1.17624
Marmoset	DDX1	1.29386	1.12236	1.08078	1.0135	1.37624	1.05231	1.70131	25.0027	1.04165	1.15406	1.15468	1.33705	1.45037	1.01094	1.00911	1.36519	1.026	1.00874	3.24611	1.03375	1.33574
Marmoset	GAPDH	1.324	1.84541	4.85688	1.01367	1.49316	1.10125	3.81925	23.4221	1.1713	1.28375	1.00058	1.00067	1.44182	1.25045	1.21424	1.17293	1.09909	1.00001	1.05839	1.10074	1.50581
Marmoset	GDE1	NA	1.07233	1.26287	1.06737	NA	1.06724	1.28821	10.3911	1.02681	1.13914	1.01922	1.1144	1.24601	1.24551	1.13354	NA	1.07326	1.02413	1.03389	1.9043	1.15751
Marmoset	GLRX	1.1848	1.1439	1.18269	1.00965	1.00907	1.33661	1.09169	18.2477	1.04111	1.02648	1.17757	1.43354	1.45018	1.08573	1.06773	0.999982	1.42782	2.65498	1.07272	1.02251	1.60221
Marmoset	GM2A	0.999982	1.13196	1.04201	1.01376	1.39559	1.06482	1.69477	12.8369	1.1023	2.52551	NA	1.15749	1.28117	1.23349	1.16344	1.00613	1.0412	1.00203	2.67273	1.06659	1.60015
Marmoset	GOLIM4	1.18754	1.29542	1.27763	1.00633	NA	1.05536	0.999973	12.4671	1.17694	NA	1.03977	NA	1.15389	NA	1.08263	NA	1.04667	1.77651	1.18088	1.18087	1.44533
Marmoset	GPAA1	2.28504	1.26844	1.29224	1.00072	1.38044	1.05393	1.10673	11.2337	1.00241	NA	1.55538	NA	1.55498	1.56	1.20236	1.35951	1.11318	1.63243	1.05599	1.08377	1.50629
Marmoset	HBA2	1.08562	1.13592	1.12706	1.01032	NA	1.09682	1.03498	17.9767	1.55775	1.80761	NA	1.08783	1.13798	1.24276	1.08423	1.04349	1.63594	1.088	1.01031	1.07168	1.41518
Marmoset	HBB	1.04931	1.14396	1.02369	1.01445	1.3439	1.11815	1.11037	26.6678	1.07678	1.82838	NA	1.10005	1.16249	1.23949	1.08919	1.03252	1.56232	1.00974	1.00947	1	1.48279
Marmoset	HEXA	0.999978	1.4054	1.03439	1.01386	1.0053	1.05793	1.8493	60.1147	1.00059	1.50854	1.06627	1.32732	1.17449	NA	1.09457	1.00292	1.08921	1.07988	1.02947	1.01195	1.54211
Marmoset	IFIT5	NA	1.22527	1.22502	1.00955	NA	1.08872	1.89737	16.0433	1.09307	1.44529	NA	1.10321	1.17431	NA	1.09212	NA	1.05166	1.04653	1.03784	1.00277	1.37075
Marmoset	LRRC28	1.30862	NA	1.30862	NA	NA	NA	1.30859	16.2208	1.05258	NA	NA	1.0527	1.08422	NA	1.04745	NA	1.02746	NA	1.01786	1.02598	1.09656
Marmoset	MAGEH1	1.22497	1.03094	1.27737	1.01274	1.47187	1.07512	1.00579	38.101	1.76973	NA	0.999989	1.42887	1.08385	1.89021	1.04845	NA	1.02853	NA	1.01869	1.02703	1.27029
Marmoset	MRPL24	1.10815	1.40525	1.19925	NA	0.999982	1.0002	1.58699	22.2545	1.01608	1.01058	1.14135	1.28069	1.45002	3.27033	3.17359	1.00226	1.01393	1.22798	1.0454	1.0926	1.13468
Marmoset	MRPL3	1.30039	1.00559	1.82796	NA	NA	NA	1.828	172.996	1.18631	1.15838	1.16677	1.12573	1.25919	1.03087	1.18394	1.18509	1.02176	1.63891	1.03861	1.94474	1.17657
Marmoset	MRPL45	1.01018	1.14332	1.00314	1.0138	1.01528	1.06905	2.56324	25.8856	1.12174	1.27425	1.04954	NA	1.18107	1.11842	1.04528	1.30611	1.00358	1.0367	1.06638	1.0999	1.32462
Marmoset	NDUFB6	1.00781	1.14324	1.07566	1.0264	1	1.12258	1.63855	51.8948	0.999982	1.00037	NA	1.13016	1.22398	1.22751	1.19989	1.14669	1.13192	0.999945	1.0595	1.06557	1.47156
Marmoset	NT5C	1.00297	1.00443	1.36024	1.2913	1.50015	1.54622	4.14476	14.8898	1.16654	NA	NA	NA	NA	NA	NA	1.02107	1.01472	1.03969	1.05282	1.07885	1.5053
Marmoset	PDK2	1.17122	3.93512	3.34944	NA	1.00072	1.00072	1.16639	521.252	2.02234	1.51311	NA	NA	NA	NA	NA	1.13909	1.0457	NA	1.02947	2.31272	1.48032
Marmoset	PIGX	1.0012	NA	1.00046	NA	1.17532	1.06351	1.35062	19.0375	1.00001	1.66065	1.17478	1.41438	1.29917	1.16876	1.16624	NA	1.08916	1.04775	1.03734	1.01331	1.56399
Marmoset	PRMT7	1.16249	NA	1.22406	1.0129	1.0297	1.08406	1.20056	13.2998	1.00395	1.45473	NA	NA	NA	NA	NA	1.10273	1.03573	NA	1.02324	1.00408	1.4504
Marmoset	SETD7	1.03945	1.00041	1.3165	1.01471	1.4581	1.10929	1.05536	13.2281	1.55856	1.00512	NA	NA	NA	NA	NA	1.04261	1.04262	NA	1.04261	2.74991	1.38694
Marmoset	SLC25A1	1.0158	1.1165	1.19859	1.01285	1.42469	1.09253	1.29886	11.262	4.5187	1.7392	1.10395	1.18968	1.44897	1.19617	1.17253	1.07277	1.00354	1.00389	2.05303	3.47403	1.60266
Marmoset	TARBP2	NA	NA	NA	1.00604	NA	1.05371	1.19691	16.1751	4.82209	1.52379	1.0377	1.01233	1.35622	1.11408	0.999998	NA	0.999999	1.15295	1.30195	2.18839	1.48602
Marmoset	TIMM22	NA	1.05522	1.18081	1.01029	1.47021	1.09559	1.01193	25.8919	1.29284	1.62733	1.17137	1.42804	1.43143	1.21716	1.14649	0.999962	1.26564	NA	1.26566	1.66097	1.45623
Marmoset	TMEM49	1.30675	1.41784	1.5395	1.01187	1.43249	1.12339	1.67633	35.9056	1.00604	1.76266	1.18138	1.40721	1.44367	1.06945	1.02598	0.999954	1.12306	1.06315	1.06604	1.03336	1.44704
Marmoset	TSPAN3	1.14998	1.14303	1.17541	1.01283	1.85705	4.16945	3.57689	16.5378	1.18033	1.83766	1.11025	1.01582	1.15676	1.1004	1.21743	1.0688	1.04581	1.50243	1.06175	1.08137	1.54202
Marmoset	TTC15	1.07545	NA	1.09708	2.77538	NA	2.77537	1.55229	309.291	1.31769	NA	1.07505	1.02979	1.39994	1.04262	1.04432	NA	1.04423	3.06353	1.00742	1.00945	1.17048
Marmoset	WWP1	1.28511	1	1.02101	1.00154	1.09281	1.11833	1.10706	21.7149	1.97983	1.22156	1.00717	0.999976	1.42083	1.22897	1.14277	1.01681	1.27724	1.03946	1.02243	2.59022	1.49095
Marmoset	ZSWIM7	NA	1.07185	1.2606	1.36435	NA	1.36435	1.52898	592.357	1.39824	1.73265	1.15322	1.00746	1.25199	1.15302	1.00439	1.07054	3.27907	1.08353	1.00184	1.00548	1.18342
Chimpanzee	ABHD8	4.64974	149.02	1.27882	1.00216	NA	1.01391	1.04614	NA	1.03769	1.72834	NA	NA	NA	1.3375	1.33751	NA	1.33752	1.54868	1.05701	1.07141	1.37891
Chimpanzee	ALG3	1.33266	45.3645	2.74009	1.01303	1.00935	1.03955	1.24716	1.03194	1.04422	1.68216	1.15716	1.40604	1.15293	NA	1.08431	1.02103	1.0772	NA	1.04888	1.06496	1.44859
Chimpanzee	ANXA6	1.21856	17.7103	1.90301	1.82994	1.09557	1.04138	1.11298	1.08147	1.13432	NA	1.15347	0.999975	1.04251	1.1479	1.13477	1.31097	1.42556	1.03582	1.03653	1.0536	1.54063
Chimpanzee	C19orf63	1.9332	13.5876	1.39499	NA	NA	NA	1.39499	NA	1.39492	2.67814	1.01167	1.23267	1.24064	1.16152	1.00369	1.06213	1.62531	1.08136	1.01343	1.05475	1.00582
Chimpanzee	C1orf86	1.17372	20.2761	2.05268	1.00442	1.16886	1.324	1.24872	0.999958	1.08252	NA	3.44088	1.01357	1.89081	NA	1.89103	NA	1.89102	1.24223	1.01013	1.00999	1.32635
Chimpanzee	C8G	3.8515	25.5158	1.08689	NA	NA	NA	1.08687	NA	1.08687	1.29912	1.0183	1.03797	1.24726	1.25262	1.08628	1.0174	1.06959	NA	1.04425	2.15435	1.12516
Chimpanzee	CECR5	4.87203	26.5423	0.999986	1.00015	NA	0.999996	1.27063	1.5499	1.16047	NA	1.16085	1.30959	1.00659	1.00132	1.96466	1.05271	1.01429	0.999952	1.05605	1.08387	1.29494
Chimpanzee	CTH	3.80864	23.9798	1.00962	1.00957	1.46132	1.02123	1.28068	1.1628	1.16364	1.81897	1.02589	1.42628	1.00276	1.12943	1.30506	1.5959	1.12477	1.22671	1.05987	1.06706	1.02767
Chimpanzee	DERA	1.66391	11.7916	1.12831	NA	1.06314	1.06307	1.2554	1.67289	1.16451	NA	NA	NA	NA	NA	NA	1.03522	1.01978	1.1407	1.21538	1.21537	2.43218
Chimpanzee	FURIN	2.39923	16.7645	1.04823	1.01311	1.03025	1.01758	1.23341	1.01572	1.03008	NA	1.01064	1.39828	1.00671	1.20983	1.11491	1.28894	1.00895	NA	1.00679	1.0087	1.45216
Chimpanzee	ITPA	1.50849	40.2832	2.26733	1.01003	NA	1.0098	1.00001	1.01592	1.18969	1.77381	1.26911	1.01279	1.1487	1.2532	1.02819	1.47271	1.05532	1.72242	1.04018	1.02289	1.01244
Chimpanzee	MXD4	4.83788	17.4729	1.02759	1.01377	1.22682	1.11355	1.15451	1.0954	1.04779	NA	1.17422	1.44122	1.3802	1.04404	1.00925	1.29908	1.09803	1.20594	1.00035	1.00035	1.45885
Chimpanzee	PDHA1	1.03526	10.1874	2.1018	1.00131	1.50562	1.00009	1.00103	1.0591	1.19166	1.15984	1.06216	1.2875	1.0093	1.15656	1.18751	0.999993	1.07343	1.31274	1.0262	1.09017	1.53413
Chimpanzee	PICK1	2.08492	37.6465	1.43864	1.00674	1.49526	1.01313	1.04527	1.02095	1.19352	1.03305	1.05728	NA	1.22944	1.03021	1.17688	1.00556	1.03194	1.62825	1.00099	1.1001	1.57144
Chimpanzee	PPP4C	1.30681	45.6242	2.95046	1.0143	1.33158	1.06116	1.47301	1.30128	1.04519	1.00036	0.999984	1.04349	1.43921	1.14804	1.1579	1.52156	2.23449	2.47198	1.07362	1.06001	1.17541
Chimpanzee	PREB	2.69613	23.93	1.09067	1.01354	1.16781	1.11057	1.00966	1.71914	1.01245	1.00015	1.02263	1.25094	1.25657	1.22673	1.21096	1.37052	1.12478	1.04527	1.04298	1.23289	1.34259
Chimpanzee	SLC25A11	3.28426	17.2672	1.00135	1.01474	1.46856	1.1167	1.01489	NA	1.01518	1.64727	1.01931	1.34413	1.00506	1.03874	1.21027	1.04807	1.00144	1.69976	1.00998	1.03827	1.46863
Chimpanzee	SLC27A4	1.80638	93.7899	2.29558	1.32733	NA	1.32731	1.18797	1.68045	1.13157	NA	NA	NA	NA	1.11526	1.09777	1.04629	1.05284	1.32655	1.05202	1.05203	1.02694
Chimpanzee	TIMM13	1.53611	41.693	2.12834	1.01473	1.40091	1.6135	1.21491	NA	1.14909	3.23771	1.1849	1.23284	1.06113	1.2687	1.05937	1.36434	1.00942	1.35586	1.35079	1.09	1.57898
Chimpanzee	TMEM14A	1.00009	11.8209	3.36781	1.05628	1.49318	1.03812	1.00436	1.47547	1.06447	1.49027	1.16714	1.36441	1.25727	NA	1.12954	1.34223	1.10038	1.69141	1.06814	1.05895	1.53611
Chimpanzee	WDR34	1.0411	26.9524	3.56537	1.00499	3.24306	1.18029	1.00289	NA	1.00289	NA	NA	NA	NA	1.15406	1.12897	1.0847	1.04298	NA	1.02774	1.04062	1.35356
Ancestral lemurs	ARSA	1.09559	1.11583	1.08227	3.09617	NA	3.09617	0.999999	1.44939	1.1413	1.10927	1.03926	NA	1.14501	NA	1.08048	1.32592	1.00109	4.17078	33.1919	3.01716	1.00469
Ancestral lemurs	CAPNS1	NA	NA	NA	NA	NA	NA	NA	NA	NA	2.35769	1.34809	2.81276	1.27825	1.06292	1.04449	1.36027	1.02462	1.65812	12.973	1.1034	1.10245
Ancestral lemurs	TMEM93	1.07898	1.06882	1.41734	1.01242	1.41677	1.04525	1.00773	NA	1.0074	1.62501	1.17306	1.40131	1.23631	1.26803	1.15338	1.02387	1.05278	1.39477	11.7388	1.27047	1.20898
Aye-aye	AMY2B	NA	1.29817	1.29816	1.06775	1.12592	1.11966	1.40848	1.00303	1.04277	1.0429	1.15702	1.39612	1.07833	1.01872	1.90987	1.22632	3.70529	53.479	1.04655	1.08692	1.30938
Aye-aye	AP3D1	NA	NA	NA	NA	1.06028	1.06034	1.06024	1.22611	1.53422	1.75513	1.00313	1.00391	1.3985	2.52037	1.74327	1.28426	1.13751	45.0167	1.18391	1.55113	1.56109
Aye-aye	BAT4	1.1918	1.01543	2.23842	1.00024	1.45844	1.09845	1.06997	NA	1.05477	1.38229	NA	1.09043	1.09013	1.21293	1.2275	1.35966	1.0869	82.3346	1.5278	3.91624	2.96777
Aye-aye	C10orf10	1.08066	1.08452	1.34138	1.01235	1.18212	1.11316	1.14154	NA	1.10162	1.00338	NA	NA	NA	1.07058	1.07062	NA	1.07062	21.2521	1.43262	1.01309	1.33395
Aye-aye	C21orf59	1.47967	NA	1.47967	1.85724	1.25743	1.23534	1.28349	0.99999	1.00104	1.02972	NA	1.14108	1.24667	1.04059	1.13597	1.1095	1.01178	31.5626	1.41038	1.00152	1.57231
Aye-aye	C7orf23	NA	NA	NA	NA	1.1216	1.1216	1.12129	1.13976	1.08304	1.11331	NA	1.87614	1.87613	1.15346	1.00791	1.34962	1.01765	11.4854	1.33336	1.06058	1.58805
Aye-aye	CD36	1.03641	1.14397	1.01046	1.06563	1.00594	1.12163	1.046	1.6694	1.00176	0.999962	3.59448	4.26981	1.40698	2.19599	3.66113	NA	3.66121	407.338	1.1015	1.06567	1.36997
Aye-aye	CLPTM1	1.32791	1.02978	1.078	1.00145	1.24516	1.34818	1.19767	1.71522	1.13793	1.20117	NA	NA	NA	2.25241	2.25236	1.30426	2.33145	23.823	1.03563	1.07709	1.05384
Aye-aye	COMTD1	1.12713	NA	1.17145	1.01423	1.41164	1.10568	1.11131	1.34329	1.1657	NA	NA	1.00038	1.00038	1.2377	0.999982	1.05935	3.36813	15.0471	1.04947	1.0737	1.50155
Aye-aye	COPB1	1.29342	1.07298	1.00828	1.01481	1.36919	1.11316	1.01501	1.54433	1.03433	1.21267	1.16831	1.3674	1.44582	1.21474	1.15168	1.24439	1.66097	64.3919	1.02097	1.04075	1.371
Aye-aye	DAP	1.29783	1.00064	1.07227	NA	NA	NA	1.0722	0.999943	1.15136	1.03587	1.08983	1.38196	1.19297	NA	1.19332	NA	1.19332	16.5193	1.18625	1.0665	1.03905
Aye-aye	DKC1	NA	1.03312	1.0819	1.00198	1.03807	1.11032	1.19668	1.3275	1.0038	1.75255	1.08188	NA	1.08188	1.18952	1.05894	1.14552	1.09502	23.4973	1.10186	1.06101	1.40599
Aye-aye	DNPEP	1.31534	0.999998	1.00007	1.0118	1.07085	1.06765	1.2191	2.29018	3.25599	1.72075	1.16321	1.42011	1.43115	1.25033	1.21706	1.05127	1.06551	33.8019	2.83974	2.60493	1.60258
Aye-aye	ELOVL5	1.33337	1.00038	1.01159	1.01024	1.15522	1.12734	1.03664	1.37219	1.04807	1.40395	1.01115	1.13886	1.41416	1.08408	1.26047	0.999954	4.93686	141.14	1.03641	1.06519	1.71662
Aye-aye	ETF1	1.33194	1.13517	1.29063	1.01404	1.26173	1.0334	1.19858	0.999953	4.79851	1.20617	1.06565	1.4405	0.999946	1.00234	2.67493	1.32144	1.58698	19141.6	3.50035	1.95372	1.39335
Aye-aye	HEXB	1.3341	1.06896	1.08019	2.83533	1.26586	1.06098	1.29948	1.05035	1.00328	1.00188	1.05502	NA	1.21514	1.28063	2.45916	1.25928	4.37915	10.9643	1.07555	1.04718	1.451
Aye-aye	HPCAL1	1.32734	4.30416	1.00438	1.01285	1.0164	1.33693	1.08907	1.19524	1.18211	2.30086	1.00187	NA	1.00187	NA	1.00187	1.2003	1.09774	13.9219	3.53318	1.04328	1.05667
Aye-aye	HRSP12	1.27939	1.12605	1.36658	1.00152	1.06546	1.12189	1.27475	1.06228	1.0088	2.32839	NA	1.16483	1.29673	1.16756	1.22313	1.23686	1.79989	62.1606	1.00632	1.07704	1.75131
Aye-aye	HSD17B11	1.03239	1.29032	1.00439	1.01356	1.42691	1.0708	1.25657	1.58417	1.82136	1.47979	1.73884	1.01335	0.999965	1.01554	1.21367	1.08084	1.03584	11.3067	1.44076	1.08257	1.76198
Aye-aye	HUS1	1.05884	1.00214	1.11604	NA	NA	NA	1.14533	0.999962	1.14144	1.71581	2.03494	1.55637	1.30082	1.2097	1.03178	1.24638	1.05063	18.411	1.1143	1.06283	1.54275
Aye-aye	IFRD1	1.15834	NA	1.21784	1.01113	1.18274	1.04103	1.05494	1.62911	1.00131	1.20997	1.10847	1.36847	1.02151	1.19898	1.3172	1.32899	1.61679	188.397	1.15375	1.0002	1.60098
Aye-aye	LOH12CR1	NA	1.02205	1.02189	NA	NA	NA	1.02198	NA	1.02197	1.41695	1.15646	1.41469	1.17576	NA	1.0933	NA	1.0524	19.1867	4.90787	1.00421	1.51515
Aye-aye	LRRC14	1.06736	1.12696	1.04639	NA	1.25975	1.08696	1.60176	NA	1.60191	NA	1.07671	1.2281	2.15153	NA	2.15163	NA	2.15166	5605.74	3.73732	3.73731	1.27248
Aye-aye	LY6E	1.0239	1.08934	2.2247	1.00327	1.00155	2.16903	1.27959	0.99994	1.01128	NA	1.14536	1.21091	1.05562	1.20234	1.0477	0.999975	1.70053	33.8566	1.00564	1.00556	1.46804
Aye-aye	MRPL40	1.12027	1.30259	1.2858	1.01343	1.0405	1.08816	1.27217	1.00723	1.03928	NA	1.27428	1.31314	1.27867	1.05854	1.19603	1.33028	1.0875	19.256	4.82254	4.82255	1.32928
Aye-aye	MRPL48	NA	NA	NA	1.00925	1.35592	1.05755	1.21377	1.34155	1.17474	1.01806	1.13089	1.4405	1.13842	1.21339	4.04158	NA	4.04166	97.8345	1.00645	1.09299	1.52653
Aye-aye	P4HA1	NA	1.00221	1.00242	NA	NA	NA	1.00242	NA	1.00242	1.35312	1.00737	1.43922	1.13486	1.06386	2.90093	1.35426	2.06094	27.992	1.02468	1.13239	1.25328
Aye-aye	PELI1	1.88985	1.30945	1.33523	1.01462	1.22511	1.05301	1.0729	NA	1.05677	1.12707	NA	1.06441	1.09176	1.02567	1.2321	1.1611	1.02527	10.5688	1.3829	1.05554	1.57323
Aye-aye	PRNP	NA	NA	NA	1.00744	1.23247	1.06048	1.228	1.59122	1.15749	NA	NA	3.34675	3.34668	NA	3.34676	NA	3.34676	30.0864	1.00997	1.00981	1.12531
Aye-aye	SAE1	NA	1.04787	1.15288	NA	1.26571	1.08854	1.13972	1.34291	1.0439	1.20774	1.15851	1.30489	1.43982	1.24961	1.18477	1.2308	1.4812	13.9948	1.02134	1.08319	1.39032
Aye-aye	SLC12A4	NA	NA	NA	1.00295	NA	1.02513	1.08063	NA	1.05954	NA	NA	1.10593	1.17484	1.16979	1.00143	1.15729	1.35174	45.9406	1.21884	1.21883	1.07387
Aye-aye	SLC16A10	NA	1.05299	1.17157	1.01417	1.3049	1.09803	1.01276	NA	1.0134	1.03575	NA	1.00941	1.00941	1.00017	1.72922	1.36612	1.55547	43.4875	1.01283	1.08604	1.00072
Aye-aye	SLC1A2	NA	1.02624	1.02595	1.01318	1.00296	1.05991	1.19987	1.19424	0.999989	1.01136	NA	NA	NA	1.28733	1.2874	1.12121	1.04835	11.63	1.63646	1.01251	1.56138
Aye-aye	SLC25A15	1.00069	NA	0.999974	1.01323	1.29032	1.10516	1.09366	1.37567	1.62684	1.15203	1.48446	1.41578	4.21496	NA	4.21503	1.18153	1.20488	10.614	0.999999	1.06755	1.24578
Aye-aye	SLC25A3	1.37356	1.09079	1.34679	1.01399	1.30334	1.90601	3.00879	1.66081	4.50068	1.76383	1.03044	1.25923	1.00199	1.17637	1.18532	1.2069	1.01542	11.2366	1.31073	1.25031	1.00849
Aye-aye	SLC25A32	1.33572	1.13063	1.30474	1.0146	1.44949	1.12681	1.18649	1.63337	1.06936	0.999978	1.0019	NA	0.999956	1.26132	1.0025	1.37124	1.01804	34.8536	1.98424	1.03424	1.22654
Aye-aye	SYMPK	1.01808	1.03202	1.32458	1.00392	1.42226	1.07557	1.00399	1.48359	1.19287	1.03615	1.1775	1.00519	1.00235	1.02262	2.54388	NA	2.54388	24.8175	1.01719	1.3083	1.5476
Aye-aye	TAF1D	NA	1.04966	1.04934	NA	NA	NA	1.04951	1.54109	1.00456	NA	NA	NA	NA	NA	NA	1.13415	1.13421	10.8115	1.08788	1.08785	1.38463
Aye-aye	TAT	1.10881	1.11906	1.06385	NA	NA	NA	1.07598	1.63595	1.10046	1.00874	1.16998	1.08455	1.03788	1.09929	1.88785	1.21244	1.08933	45.6271	1.28539	1.01349	1.4025
Aye-aye	TFB1M	1.33361	1.05523	1.32796	1.01429	1.26754	1.04354	1.01718	1.70627	1.04066	0.999916	1.16495	1.3414	1.44226	1.07585	1.10379	1.20883	1.05432	13.7951	1.7347	1.00162	1.47864
Aye-aye	TFPI2	1.30016	1.03291	1.17853	NA	NA	NA	1.17875	1.47932	1.48607	NA	1.14892	1.16462	1.00522	1.12235	1.55825	1.33439	2.01026	4866.83	2.40484	2.40483	1.34431
Aye-aye	TMEM120A	1.1564	1.0793	1.36105	1.00999	1.48999	1.09282	1.17254	1.20692	1.01376	NA	1.4388	1.18123	1.60293	NA	1.60292	NA	1.60291	108.977	1.68935	1.68934	1.14427
Aye-aye	TMEM5	1.02074	NA	1.02073	NA	NA	NA	1.02029	1.5866	1.00034	NA	1.00623	1.43118	1.00689	1.2157	1.20588	1.27717	1.82008	20.1666	1.01324	1.01844	1.4746
Aye-aye	VAC14	1.05742	NA	1.07518	NA	NA	NA	1.09306	NA	1.06778	NA	1.09443	1.30868	1.13735	1.23068	1.00127	1.22569	1.31825	17.4646	1.04381	1.04378	1.07831
Coquerel's sifaka	ARL5A	1.32185	1.10703	1.08186	1.0149	1.49285	1.12675	1.00001	1.71124	1.00531	1.73653	1.29709	NA	1.29709	1.23161	1.02394	35.3591	1.55614	1.85773	1.07554	1.0997	1.26272
Coquerel's sifaka	BAAT	1.30949	1.10359	1.04777	NA	1.011	1.01033	1.18665	NA	1.13088	1.27768	NA	4.67734	4.67735	NA	4.67733	11.2144	1.04616	NA	1.02987	1.07439	1.48959
Coquerel's sifaka	C14orf153	NA	NA	NA	1.03086	1.34676	1.08891	1.08891	NA	1.08874	3.64347	NA	NA	NA	1.86652	1.86658	25.6467	1.01049	1.67687	1.00324	1.0348	1.35862
Coquerel's sifaka	C17orf95	NA	NA	NA	1.00569	1.36286	1.1583	1.15776	1.57106	1.40328	1.67798	2.22881	4.99165	1.37192	1.25296	1.03643	18.2457	1.22212	1.63063	1.55591	2.60009	1.18036
Coquerel's sifaka	C6orf108	1.1231	1.23277	1.15903	NA	NA	NA	1.15913	NA	1.1591	1.78787	1.17033	1.14223	1.1763	1.10821	2.63755	45.9199	1.02062	1.02012	1.06724	1.07591	1.02385
Coquerel's sifaka	C7orf28B	1.0358	NA	1.0389	1.36781	1.00762	1.03611	1.27342	1.0933	1.1115	NA	1.56119	1.40278	4.3317	NA	4.33191	34.8599	1.01815	1.60886	1.01966	1.0278	1.48244
Coquerel's sifaka	C9orf114	1.01591	NA	1.01591	NA	1.19457	1.19484	1.09505	1.41512	1.16235	1.0033	NA	1.03071	1.03216	1.42068	4.93366	16.999	1.10588	1.36874	1.02539	1.09554	1.43792
Coquerel's sifaka	CAPZB	1.08675	1.05704	1.19112	1.00924	1.38997	1.11662	1.25751	1.07609	1.16627	1.7925	1.05356	1.19166	1.06852	1.1138	1.21678	10.1275	4.60798	2.08996	1.03983	1.06253	1.48649
Coquerel's sifaka	CLINT1	NA	NA	NA	NA	NA	NA	NA	NA	NA	1.33504	1.04059	1.43409	1.00344	1.24113	1.03552	35.5268	1.51264	1.0993	1.0181	1.04684	1.44208
Coquerel's sifaka	CYTH2	1.22923	1.10318	1.00843	1.01428	2.64193	2.15158	1.03055	1.5006	1.01557	1.41198	NA	1.38106	1.38091	NA	1.38111	12.3929	1.10895	NA	1.10894	1.5424	1.00019
Coquerel's sifaka	DHRS7B	1.32733	1.12468	1.32605	1.00559	1.42299	1.08679	1.00068	1.70081	1.003	1.10245	1.17998	1.41897	1.41556	2.84894	2.35813	52.2152	1.0085	NA	1.00864	1.06398	1.35103
Coquerel's sifaka	DR1	1.03079	1.06462	1.36044	1.01818	1.15096	1.08609	1.16366	1.70508	0.999996	1.01418	0.999993	1.41261	1.40268	1.23578	1.99598	279.099	1.38175	NA	1.38179	1.01761	1.48302
Coquerel's sifaka	DUSP16	1.32178	1.05483	1.09899	1.01451	1.0015	1.02162	1.08858	NA	1.0665	NA	1.00676	1.40501	1.43542	NA	1.43533	17.4275	1.07151	1.1167	1.02779	1.04041	1.53876
Coquerel's sifaka	FBXW2	1.08309	1.06684	1.30708	NA	1.27323	1.09053	1.26225	0.999958	1.00704	1.82547	1.29342	1.08095	1.02065	1.16374	1.45576	11.6037	1.01245	1.09036	1.0703	1.09469	0.999951
Coquerel's sifaka	FIS1	1.31841	1.08517	1.00935	1.01205	1.20216	1.00218	1.26979	1.71362	1.16947	1.00464	1.17297	1.44388	1.40097	1.0665	1.14318	20.8481	3.15316	1.12202	1.35676	1.00638	1.0607
Coquerel's sifaka	FPGS	1.07497	1.00824	1.27613	NA	1.17607	1.06392	1.05085	NA	1.03901	NA	1.7625	1.09846	1.67875	NA	1.67879	16.9519	1.0458	NA	1.04579	1.04575	1.31464
Coquerel's sifaka	GALNT2	1.005	1.0044	1.36382	1.01205	1.35738	1.12756	1.28562	1.62261	1.18046	1.0284	1.1001	1.08398	1.04395	1.21095	1.03428	20.2979	1.4729	NA	1.47294	1.04239	1.12918
Coquerel's sifaka	GART	1.4647	NA	1.46465	1.07777	NA	1.07774	1.2304	1.56774	1.12062	NA	1.00904	1.19175	1.03761	NA	1.03191	16.8119	2.2262	1.56098	1.04754	1.07069	1.5375
Coquerel's sifaka	GPR146	1.16237	NA	1.22389	1.01176	1.24707	1.09996	1.1888	NA	1.13232	1.45422	1.02343	1.40416	1.23516	NA	1.23535	154.401	2.05034	1.03783	1.02335	1.06585	1.47861
Coquerel's sifaka	HERPUD1	1.03947	1.13494	1.15695	1.01279	1.43107	1.05723	1.4029	1.00979	1.0819	1.08497	1.15684	1.3496	1.43813	1.06745	1.09185	14.6919	1.18774	NA	1.18775	1.07667	1.4622
Coquerel's sifaka	HLCS	1.09019	1.13654	1.07365	1.00961	NA	1.08936	1.0293	NA	1.0293	NA	1.36768	1.07739	1.22205	1.12402	1.0479	18.8073	1.71905	NA	1.71905	1.71905	1.15285
Coquerel's sifaka	ID2	1.28671	1.14342	1.39547	1.0123	1.14132	1.01616	1.20712	1.22587	1.194	1.05056	1.17989	1.43527	1.41049	1.03307	1.16419	17.3782	1.06655	1.72716	1.08923	1.03868	1.0125
Coquerel's sifaka	IER3	1.43591	1.01359	1.25068	1.00702	1.46287	1.00015	1.09071	1.30515	1.04308	1.1435	1.00172	1.41206	1.02219	1.25159	1.00985	12.3152	1.4097	1.67345	1.79647	1.16174	1.45556
Coquerel's sifaka	ITGA9	1.16237	NA	1.2239	1.01259	1.37716	1.035	1.00907	NA	1.00907	NA	1.17815	1.27971	1.10473	1.12461	2.20398	34.9059	1.00804	1.63395	1.01907	1.01908	1.42893
Coquerel's sifaka	KCTD20	1.33333	1.00041	1.04358	1.05765	1.03389	1.08924	1.00376	NA	1.00376	NA	1.03556	NA	1.09938	1.01399	1.79157	22.0558	1.00088	1.08316	1.04769	1.07092	1.22491
Coquerel's sifaka	KEAP1	1.17154	1.14384	1.13186	1.00953	1.47799	1.09638	1.27304	1.28625	1.07443	NA	1.18024	1.01856	0.999986	1.14203	1.36945	16.9839	1.00898	1.59405	1.00088	1.00088	1.43258
Coquerel's sifaka	LAS1L	1.15489	NA	1.21274	1.0138	1.40899	1.0989	1.16059	NA	1.11363	NA	1.01048	NA	1.01186	1.09577	3.57698	66.751	1.03444	1.32835	1.04529	1.06735	1.44782
Coquerel's sifaka	LOC387763	1.04831	1.08887	1.34237	1.01316	1.09523	1.10357	1.24844	1.25161	1.03556	NA	1.0772	NA	1.0772	1.19403	1.52674	28.3759	1.10359	NA	1.10363	1.10364	1.33391
Coquerel's sifaka	LYVE1	1.00186	1.03818	1.36135	1.01484	1.48864	1.12152	1.28895	1.43088	1.12361	1.13262	1.03687	1.36703	1.11034	1.31974	3.59882	75.5525	1.02256	1.58453	1.01532	1.0531	1.56847
Coquerel's sifaka	MAPK1IP1L	1.33392	1.13615	1.34557	1.01363	1.36725	1.12693	1.24646	1.71873	1.16385	1.67289	1.81757	1.33862	2.31699	1.20538	1.28297	96.165	1.37041	1.05503	1.00849	1.03978	1.33873
Coquerel's sifaka	MOGAT1	NA	NA	NA	NA	NA	NA	NA	NA	NA	1.04225	1.0513	1.42657	1.84708	NA	1.8473	1866.33	2.14589	1.255	1.03717	1.04642	1.43551
Coquerel's sifaka	MTMR6	NA	NA	NA	1.01402	NA	1.01401	1.01386	NA	1.01402	NA	1.09975	1.01356	3.73407	NA	3.73406	63.18	1.01126	NA	1.01129	1.01125	1.43333
Coquerel's sifaka	MTSS1	NA	1.02862	1.0626	1.00388	1.4951	1.00366	1.25051	1.66188	1.13689	1.1946	NA	NA	NA	1.09328	1.08009	13.1426	2.32003	1.02374	1.0077	1.07483	1.5978
Coquerel's sifaka	RELL1	1.29842	1.06305	1.04487	NA	NA	NA	1.05128	1.03087	1.25809	NA	1.11616	1.25782	1.118	1.09026	2.51951	23732.9	2.69597	1.10084	1.36595	1.36596	1.52509
Coquerel's sifaka	SKP1	1.26655	1.06312	1.26355	1.21858	1.05112	1.11657	1.02396	1.71076	1.00575	1.8239	1.39773	1.0287	1.01628	1.0337	2.07749	21.2092	1.02871	1.17717	1.07011	1.09561	1.0365
Coquerel's sifaka	SNRPD3	1.17557	1.13304	1.30486	1.00737	1.45327	1.09037	1.27211	1.71506	1.18367	1.77993	1.13808	1.0131	1.25176	1.01115	1.39816	39.4944	1.08558	1.12183	1.07535	1.10089	1.51961
Coquerel's sifaka	SNX15	NA	NA	NA	NA	1.10633	1.04032	1.14035	NA	1.1002	1.19235	1.12536	1.05585	1.01606	1.2197	1.05296	78.0199	2.37582	NA	2.37582	1.02219	1.20818
Coquerel's sifaka	SPRY2	3.10184	1.01849	0.999994	1.00695	1.49636	1.03488	1.2037	NA	1.1419	1.06283	1.00005	1.44318	1.17903	1.01813	3.89038	83.818	1.03085	1.71234	1.01736	1.08185	1.30103
Coquerel's sifaka	TMBIM4	NA	NA	NA	1.00326	NA	1.02739	1.08254	1.89336	4.30356	1.54124	1	1.05603	1.42133	1.84258	1.47129	13.9628	1.00482	1.05168	1.07238	1.04746	1.03057
Coquerel's sifaka	TMEM129	NA	NA	NA	NA	1.55569	1.55571	1.55565	1.01677	1.10406	1.02619	1.06581	1.39905	1.06923	1.09769	2.10257	33.5211	1.00597	1.11831	1.0683	1.07841	1.56816
Coquerel's sifaka	TMEM189	1.09109	NA	1.11862	1.00627	1.19027	1.26969	1.04428	1.67313	1.08896	NA	1.07854	1.43766	1.45533	1.23351	2.23059	752.747	1.83927	NA	1.83928	1.83928	1.31492
Coquerel's sifaka	TMEM63A	NA	1.03668	1.11705	NA	NA	NA	1.14715	1.77858	1.11672	NA	NA	1.09941	1.16231	3.2172	1.59606	29.796	1.06402	NA	1.06399	1.06401	1.47405
Coquerel's sifaka	TSR2	1.05698	1.49303	1.02386	1.00212	1.17411	1.6979	1.01291	1.25179	1.24876	NA	1.16519	1.24258	1	1.05969	4.48818	530.446	1.13079	NA	1.13083	1.13085	1.49368
Coquerel's sifaka	TXNL4B	NA	NA	NA	NA	1.04592	1.04596	1.04574	1.54388	1.00757	1.13956	1.15693	0.999975	1.01912	NA	1.01966	22.546	1.8775	NA	1.8775	1.04317	1.49781
Coquerel's sifaka	UBE2G2	NA	NA	NA	1.00358	1.30582	1.5261	1.5261	1.04241	1.10771	1.03723	1.02514	NA	1.02323	1.23728	1.1185	20.4611	1.12805	1.46812	1.62778	1.03623	1.04629
Coquerel's sifaka	UTP11L	1.00011	1.01969	1.36554	1.011	1.2029	1.02472	1.17007	1.00046	4.07331	1.51749	NA	1.11334	1.18941	1.10929	1.0127	148.526	4.30977	1.05371	1.43722	1.17144	1.00139
Coquerel's sifaka	WDR55	NA	1.00558	1.0052	NA	NA	NA	1.0055	1.57934	1.01013	NA	1.15369	1.43976	1.31978	1.16927	1.00615	12.0123	2.03466	NA	2.03469	2.03469	1.0317
Coquerel's sifaka	WDR59	NA	NA	NA	NA	NA	NA	NA	1.11788	1.04683	NA	1.10993	1.4097	0.999986	1.252	1.03657	36.0414	1.53982	1.01327	0.999999	0.999998	1.33161
Coquerel's sifaka	XDH	1.22756	1.08659	1.05595	NA	1.21464	1.07506	1.00161	1.19914	1.32941	1.00778	1.55772	NA	1.55758	NA	1.55771	40.6547	1.27861	NA	1.2786	4.38945	1.02587
Coquerel's sifaka	ZADH2	1.47246	1.02499	1.03994	1.01485	1.06779	1.05056	1.9209	1.71859	2.07722	1.12063	1.17023	1.41533	1.44836	1.31289	1.25827	342.907	2.0053	1.69029	1.71763	1.02836	1.1138
Black and white ruffed lemur	ALKBH4	NA	1.0097	1.0115	NA	1.0951	1.09503	1.17855	1.33119	1.00424	1.07658	NA	2.15674	2.15676	1509.01	3.08109	1.3123	1.64038	1.44834	3.3863	1.07383	1.37818
Black and white ruffed lemur	ASB8	NA	NA	NA	NA	NA	NA	NA	NA	NA	1.46279	1.08266	1.43614	1.67096	29.3052	1.29933	NA	1.29933	NA	1.29933	1.21161	1.21119
Black and white ruffed lemur	ATPAF2	1.34929	1.00625	1.26037	1.01478	1.16794	1.07891	1.27111	1.33069	1.07909	NA	1.34123	1.39988	1.78784	22.7856	1.04521	1.1231	1.11423	1.62601	1.05582	1.0835	1.32982
Black and white ruffed lemur	C11orf17	1.10488	NA	1.13961	NA	1.19253	1.06839	1.00257	1.32744	1.1226	NA	1.33356	1.43956	3.34356	635.34	1.4278	1.35132	1.23407	1.00818	1.02681	1.03871	1.48818
Black and white ruffed lemur	C19orf50	1.00367	2.06774	1.07783	1.15533	1.99881	1.09162	1.01537	0.999964	1.19453	1.11166	1.16768	1.14003	2.43219	13.0069	1.03548	1.36519	1.01121	1.70645	1.02278	1.177	2.13377
Black and white ruffed lemur	CAMKK2	1.1136	1.00068	1.25232	1.00003	1.0284	1.113	1.16917	NA	1.11943	NA	4.90906	1.07348	1.40539	130.686	2.05818	1.07733	1.02652	NA	1.01757	1.02517	1.29064
Black and white ruffed lemur	CCDC22	1.15758	NA	1.21671	1.00323	1.43515	1.04572	1.125	1.49305	1.00067	1.11408	1.1776	1.00039	1.13906	53.8349	1.98239	1.16217	1.0642	1.60707	1.00059	1.06839	1.37034
Black and white ruffed lemur	CCDC85B	1.29384	2.29109	2.80661	1.00764	1.38812	1.01281	1.04479	NA	1.0448	NA	1.15837	1.15393	1.04729	12.3011	1.34601	1.35974	1.34023	2.15646	1.05136	1.07659	1.01538
Black and white ruffed lemur	CD82	NA	NA	NA	1.00885	1.37103	1.05372	1.19525	1.0011	1.06453	1.82497	1.04601	1.43539	1.26041	119.814	2.21654	1.37201	2.12381	1.04798	1.01531	1.00093	1.53614
Black and white ruffed lemur	CHPF2	1.00022	1.12322	1.12709	1.01477	1.2806	1.07008	1.29392	1.4125	1.14886	1.76947	1.0699	1.97563	1.16986	12.0497	1.2131	NA	1.21306	1.02357	1.06198	1.07813	1.47794
Black and white ruffed lemur	CSRP1	1.33439	1.04552	1.00056	1.00801	1.4607	1.00328	1.2987	1.12803	1.09527	1.27	1.00845	3.25001	1.05458	34.3626	2.02336	1.27335	1.20578	1.36859	1.00087	1.05431	1.55082
Black and white ruffed lemur	CTSB	1.256	1.14375	1.23571	1.01393	1.40422	1.07186	1.27996	1.49982	1.12273	1.06603	2.06472	1.26792	2.22889	44.3285	1.06815	1.07706	4.76422	1.20841	1.00887	1.0665	1.58139
Black and white ruffed lemur	CYBA	1.12619	1.06977	1.10894	1.01091	1.08895	1.12127	1.16943	1.20026	1.18803	1.73204	2.44244	NA	2.44234	51.2927	1.12382	NA	1.12399	1.15346	1.03823	1.06759	1.22918
Black and white ruffed lemur	CYP8B1	NA	NA	NA	NA	NA	NA	NA	NA	NA	NA	NA	4.47693	4.4769	30.7418	1.00217	NA	1.00217	0.999948	1.02961	1.04349	1.38965
Black and white ruffed lemur	DNAL4	NA	1.00169	0.999965	1.08921	1.46896	1.05448	1.2281	1.00447	1.13308	NA	1.06583	NA	1.28526	11.5374	4.72196	1.14847	1.5635	1.17782	1.04566	1.06781	1.49362
Black and white ruffed lemur	DNASE2	NA	2.38834	2.38822	3.2816	NA	3.28158	1.17009	NA	1.12007	NA	1.16922	1.29263	1.02142	14.7923	2.28703	1.32522	3.51129	1.00102	1.15823	1.15819	1.202
Black and white ruffed lemur	FUCA2	1.10352	1.06504	1.13666	1.01287	1.16269	1.00359	1.09313	NA	1.069	NA	1.45653	1.1791	1.22504	39.6443	1.67763	1.89307	1.07204	NA	1.04572	1.0679	1.14822
Black and white ruffed lemur	IGSF8	1.34874	1.09358	1.02274	1.00394	NA	1.03103	1.20285	1.67498	1.14946	NA	1.16322	1.02328	1.1871	141.947	2.57652	1.07757	1.10365	0.999938	1.04895	1.07288	1.08471
Black and white ruffed lemur	KLHDC4	NA	NA	NA	1.00403	NA	1.03496	1.11847	NA	1.08554	1.11976	1.99549	NA	1.99549	27.6626	1.02686	1.24059	1.05613	1.00869	1.06762	1.03201	1.40512
Black and white ruffed lemur	LONP1	1.05181	1.14264	1.06316	1.01237	1.49245	1.08203	1.26793	1.55295	1.17324	NA	1.62084	NA	1.62038	51.1416	1.51325	NA	1.51324	1.02023	1.03811	1.05615	1.15754
Black and white ruffed lemur	MED10	1.00688	2.19101	1.02647	1.01391	1.41915	1.12783	1.09869	1.03535	1.09987	1.60071	1.16693	1.21825	1.29582	32.6174	1.55	NA	1.54995	1.3828	1.02247	1.21789	1.01527
Black and white ruffed lemur	NOSIP	1.00749	2.18256	1.02352	1.00585	1.46018	1.0746	1.13628	1.55758	1.00784	NA	1.12796	1.24758	1.09286	80.0988	3.74081	NA	3.74083	2.13098	1.04841	1.07202	1.32248
Black and white ruffed lemur	PARP16	1.0018	NA	1.0018	NA	NA	NA	1.0018	1.55283	1.04344	NA	1.01011	1.27361	1.01211	13.5578	2.29355	1.06362	1.01441	NA	1.01004	1.01379	1.46806
Black and white ruffed lemur	PDCD6	1.03374	1.00186	1.2956	1.00496	1.33171	1.10391	1.29567	1.69478	1.19451	1.55817	1.16401	1.04142	1.01592	17.8387	1.75208	1.12164	1.01288	1	1.07157	1.10066	1.59957
Black and white ruffed lemur	PITRM1	1.152	NA	1.2085	1.00792	NA	1.07191	1.16556	1.23737	1.04326	1.54412	1.01264	1.37344	1.93121	23.4183	1.02048	1.47145	1.1011	1.03362	1.06601	1.09776	0.99996
Black and white ruffed lemur	PNKP	1.00455	NA	1.00436	NA	NA	NA	1.0043	NA	1.00451	1.69133	1.10267	1.43188	1.51084	13.1532	1.02794	NA	1.02794	1.13706	1.04681	4.21916	1.89225
Black and white ruffed lemur	POR	1.29054	1.13798	1.36062	1.01336	1.0863	1.10167	1.22702	1.48685	1.19304	1.75563	1.18094	1.09638	1.02388	10.3551	1.94106	1.36547	2.03771	1.67576	2.74293	1.03523	1.01585
Black and white ruffed lemur	PRELID1	1.21987	1.116	1.36554	1.01439	1.44415	1.12764	1.28982	1.03349	1.11373	1.45775	1.17949	1.00827	1.05521	15.3972	1.43991	1.02555	1.08633	1.03703	1.07233	1.06276	1.56866
Black and white ruffed lemur	PTGES2	1.1469	1.0042	1.2768	1.13785	1.17491	1.12771	1.19241	1.05285	1.10243	NA	1.14362	1.10983	1.01224	35.2269	2.50903	1.7292	1.09959	1.18727	1.00061	1.00061	3.05354
Black and white ruffed lemur	RFNG	1.15119	NA	1.15127	NA	NA	NA	1.15097	1.59664	1.09434	1.78886	1.16724	1.07405	1.06238	14.871	1.37516	1.25376	1.01432	1.56101	1.06046	1.08197	1.01289
Black and white ruffed lemur	RPL13	2.72254	1.37397	1.28631	1.01077	1.37549	1.0029	1.44162	1.48111	1.10215	0.999984	1.17309	1.36788	1.5756	12.8978	1.01088	1.14499	1.44924	1.04197	1.0484	1.09646	1.17932
Black and white ruffed lemur	S100A11	1.01629	0.999994	1.31721	1.01472	1.34246	1.09729	1.0106	NA	1.0106	1.27194	1.18033	1.37715	2.02073	22.035	1.01131	1.37174	1.00221	1.59811	1.01938	1.13923	1.17101
Black and white ruffed lemur	SF3B2	1.60137	1.00014	1.12771	1.2927	1.03375	1.04041	1.27534	1.65534	1.15298	NA	1.01241	1.40635	1.67387	1011.17	3.41888	1.16957	1.0198	1.66396	1.00899	1.0114	1.18713
Black and white ruffed lemur	SIVA1	1.11335	1.14126	1.41456	1.0097	1.46234	1.02367	1.03015	1.00079	1.19341	1.83611	1.06403	1.34174	1.18703	81.4612	2.12683	1.06539	1.02686	1.57906	1.00892	1.00024	1.17438
Black and white ruffed lemur	SPAG7	1.31622	1.02345	1.05508	1.01369	1.0531	1.35823	1.17255	1.49318	1.01371	1.81994	1.46318	1.00951	1.00956	15.1253	1.66207	1.30043	2.41157	1.72498	2.69606	1.04338	1.49473
Black and white ruffed lemur	TAP2	1.0934	NA	1.12308	NA	1.2426	1.08232	1.13579	1.19139	1.02946	1.09678	1.16811	1.01091	1.19007	39.7534	2.12036	NA	2.12034	NA	2.12037	1.03321	1.50424
Black and white ruffed lemur	TBC1D7	1.24704	1.11862	1.2908	1.00131	NA	1.00578	1.07666	NA	1.07668	NA	1.13881	1.03429	1.39716	12.4195	1.05385	1.12712	1.07077	NA	1.04494	1.06671	1.29935
Black and white ruffed lemur	TKT	0.999965	1.12031	1.36009	1.01249	1.43162	1.12591	1.543	2.64493	1.19256	1.03285	1.06401	1.02979	1.14847	20.9247	4.21285	1.33879	2.35218	1.26736	1.28123	1.05142	1.00154
Black and white ruffed lemur	TSEN34	1.1101	2.16984	1.46881	NA	1.2873	1.28733	1.26485	1.5711	1.18674	1.35793	1.00429	3.02511	1.1568	33.8109	1.59284	1.04772	4.86994	1.37197	1.00062	1.05558	1.00859
Black and white ruffed lemur	ZDHHC12	1.2787	1.35975	1.30577	1.01409	1.02661	1.01488	1.23382	1.35823	1.19362	1.82623	1.42029	NA	1.42012	179.324	2.3034	1.36764	1.78883	1.62084	1.06963	1.08665	1.4497
Ancestral eulemur	ACSL4	1.05619	NA	1.06946	1.00621	NA	1.05454	1.15501	1.21564	1.02948	1.00927	1.14713	1.86955	14.5758	1.00878	1.42037	1.14927	1.00034	1.16402	1.35139	1.00433	1.55816
Ancestral eulemur	AIG1	1.56146	2.16723	1.24227	1.27584	1.43338	1.10474	1.01677	1.55774	1.0131	NA	1.06125	1.02473	11.5265	1.11679	2.45704	2.36787	1.11267	1.44614	1.04139	1.06111	1.83241
Ancestral eulemur	COPZ2	1.01958	1.07848	1.34189	1.00842	2.01018	1.02997	1.04914	1.78075	1.05047	2.98617	1.02191	1.10545	13.4505	1.18131	3.51259	1.01216	1.01629	1.00239	2.35822	1.08273	1.41845
Ancestral eulemur	HN1	NA	1.07688	1.2844	1.01427	1.42335	1.08695	1.03565	1.01958	1.83334	1.02099	1.06379	1.18042	11.7065	3.25348	1.15526	1.75613	1.03284	1.70958	1.08293	2.67923	1.4165
Ancestral eulemur	NEU1	1.00608	1.06026	1.30921	1.00447	1.41014	1.08346	1.00275	1.06433	1.15322	1.07492	1.18097	3.58696	13.587	1.78947	1.01178	0.999969	1.12501	1.11492	1.05165	1.07801	1.59559
Ancestral eulemur	PRKCDBP	1.24418	1.09518	1.3374	1.01203	1.49517	1.09625	1.1809	NA	1.12722	1.81327	4.37731	1.35129	10.7218	1.18877	3.11101	1.00975	1.00449	1.10781	1.05571	1.06831	1.47793
Ancestral eulemur	RFC1	NA	NA	NA	NA	1.1142	1.04302	1.15128	NA	1.10755	1.43275	1.01758	1.05332	11.1449	1.17234	2.92706	1.06945	1.12965	1.0175	1.05941	1.08231	1.51204
Ancestral eulemur	SFT2D2	1.26038	1.05621	1.00394	1.01481	1.28614	1.09853	1.82348	1.31072	4.6971	1.62511	1.16435	2.61733	20.3824	2.16103	1.00679	1.27342	1.10102	NA	1.10105	1.00834	1.30235
Ancestral eulemur	SGK196	NA	NA	NA	NA	NA	NA	NA	NA	NA	1.27785	1.12745	3.24257	248.099	1.1343	3.30956	NA	3.30956	1.10829	1.01478	1.03797	1.33239
Ancestral eulemur	SOAT2	NA	NA	NA	1.00484	NA	1.04245	1.14902	NA	1.10602	NA	1.86504	1.01554	435.808	1.51507	1.81688	1.19771	1.08955	1.10382	1.04939	1.07355	1.42255
Ancestral eulemur	THRSP	1.25488	1.10035	1.35059	1.01228	1.05005	1.10878	1.12571	1.02668	1.16217	1.4942	1.30138	1.12817	19.0311	1.50374	1.01871	1.08347	1.09893	1.00005	1.05865	1.02594	1.28339
Ancestral eulemur	UBL7	1.30868	1.10592	1.03755	1.00352	1.06243	1.12612	1.04472	1.67073	1.08891	1.30186	1.07541	1.1873	10.2807	1.12264	2.28028	1.26046	4.08728	0.999914	1.14226	1.00024	1.34991
Slow loris	ANAPC7	0.999975	1.03043	2.92234	1.01329	1.55698	1.19003	1.10402	1.48416	1.15183	15.5093	1.17484	1.0048	1.00214	1.02849	1.1969	1.50422	1.3423	NA	1.34228	1.03277	1.34542
Slow loris	C10orf57	1.3172	1.13872	1.36623	1.0063	1.50149	1.00602	1.13844	1.07214	2.71466	13.2947	1.00083	1.42038	1.01409	1.10487	2.0027	NA	2.00266	1.32015	1.07593	1.00482	1.18845
Slow loris	C14orf133	2.88206	1.27405	1.16606	NA	1.26002	1.08703	1.03446	NA	1.0293	43.2132	NA	NA	NA	NA	NA	NA	NA	1.21634	1.21659	1.09767	1.22582
Slow loris	C16orf61	NA	0.999996	0.999987	1.01465	1.45264	1.11671	1.00578	1.11068	1.16695	46.7498	1.08062	NA	1.38537	1.10703	1.09738	1.20295	2.14708	1.7007	2.70702	1.08715	1.58113
Slow loris	C6orf162	NA	NA	NA	1.48651	NA	1.48651	1.4865	NA	1.4865	5381.05	1.00287	NA	1.00256	NA	1.00285	NA	1.00294	1.13492	3.47551	1.02312	1.4466
Slow loris	CBX3	0.999993	1.00362	1.34981	1.01149	1.50286	1.09824	1.06554	1.00315	1.40265	52.1297	1.03178	NA	1.10672	NA	1.06324	0.999974	1.08949	1.04126	1.01403	1.16019	1.57104
Slow loris	COG2	NA	NA	NA	1.0042	1.41978	1.04155	1.04102	1.30812	1.48785	49.5296	1.01996	1.26138	1.23482	1.20366	1.21454	1.27019	1.11344	1.3312	1.02958	1.78448	1.45404
Slow loris	CTBS	NA	1.02285	1.0405	1.01455	1.49297	1.11632	1.01173	1.13421	1.57488	41.2603	1.10525	0.999999	1.29144	1.00428	1.14931	1.23862	1.00881	1.11816	1.30354	1.01511	1.00644
Slow loris	CWF19L1	NA	NA	NA	NA	1.00216	1.00216	1.00216	1.03645	2.61561	46.1959	1.05276	NA	1.20869	1.17095	1.00326	NA	1.00329	NA	1.0033	1.49226	1.41211
Slow loris	DDX50	1.27277	1.00446	1.36477	NA	1.13679	1.05315	1.05607	NA	1.05631	21.5308	NA	1.0165	1.0168	NA	1.01592	1.20032	1.0333	1.45996	1.28863	1.02317	1.45849
Slow loris	DONSON	NA	NA	NA	3.72777	4.5894	1.06481	1.2489	1.05349	1	3213.52	1.16122	1.43898	1.38225	1.00871	1.04136	1.00772	1.42742	1.33015	3.43828	1.00732	1.48179
Slow loris	ERO1L	1.30616	1.09611	1.10151	NA	NA	NA	1.12595	1.40816	1.01156	23.555	1.03835	1.38254	1.32553	NA	1.32584	1.00152	1.09535	1.17277	1.44794	1.04728	1.52243
Slow loris	FBXO22	1.29432	1.13804	1.21321	1.00146	1.39989	1.05803	1.40689	NA	1.40676	264.569	1.17853	1.03908	1.00288	1.10803	1.14565	NA	1.07916	1.74619	2.24084	1.00286	1.26205
Slow loris	GNG5	1.8149	1.65567	1.35994	1.00822	1.49707	1.03298	1.02032	1.53475	1.22067	24.9055	1.04414	1.37521	1.18674	1.26954	1.14603	1.11755	1.05349	0.999986	1.41077	1.04856	1.01876
Slow loris	HTRA1	1.3639	1.08921	1.00208	1.16293	1.24336	1.00814	1.28261	1.14813	1.0284	43.0315	NA	1.01513	1.01548	NA	1.01457	1.10046	1.24324	NA	1.24324	1.02229	1.46268
Slow loris	ICAM2	1.00173	1.3843	1.06359	1.0147	1.44272	1.11231	1.08754	NA	1.06554	103.999	NA	1.00006	1.00006	0.999986	2.2343	1.27711	1.56183	NA	1.56182	1.01088	1.32148
Slow loris	ILF2	1.00438	1.0198	1.29683	1.00675	1.50069	1.05525	1.08603	1.24523	1.04039	17.8895	1.16699	1.28129	1.40135	1.00243	1.0902	1.44318	1.11743	1.00108	1.03329	1.33092	0.999966
Slow loris	ITGB5	1.01531	1.09023	1.18012	1.05964	1.49635	1.11277	1.00963	NA	1.01026	105.971	1.18096	0.999959	1.08993	1.0204	1.21273	1.17234	1.16606	1.66338	1.0831	1.21906	1.30603
Slow loris	KBTBD2	1.0095	NA	1.00957	1.02042	1.48063	1.04878	1.23571	1.36377	1.05017	22.4188	NA	1.1044	1.17129	1.17983	1.00432	1.36473	1.03104	1.17387	1.15568	1.01471	1.52197
Slow loris	LEPROT	1.3357	1.0376	1.00232	1.01458	1.34764	1.07592	1.23921	1.2576	1.18955	180.719	1.06922	NA	1.30729	1.09218	0.999977	1.02042	1.6922	1.26455	4.26532	1.08418	1.4655
Slow loris	METTL7A	1.32293	1.04957	1.49993	1.0022	NA	1.01429	1.00005	NA	1.00005	47.3816	NA	1.14052	1.24601	1.2152	1.155	NA	1.08369	4.94739	3.08845	1.06853	1.28781
Slow loris	MMADHC	0.999978	3.24414	1.26581	1.14997	1.00102	1.09532	1.03299	1.71493	1.02294	12.7701	1.08338	1.35352	1.2906	3.48647	1.70598	1.0068	1.01627	1.72865	1.01121	1.07892	1.53977
Slow loris	MOBKL2C	NA	NA	NA	1.01175	1.3597	1.0649	1.24933	1.48951	1.16165	38.7381	NA	1.10556	1.10571	NA	1.10563	1.2508	1.05194	1.3412	3.21344	1.08641	1.47751
Slow loris	MRPL2	1.07408	1.09032	1.34059	1.0048	1.25478	1.10725	1.20318	NA	1.14162	10.1533	1.00892	1.41055	1.59849	1.26076	1.8263	1.24574	3.31359	1.52026	2.10606	1.08895	1.57436
Slow loris	MRPL41	1.40237	1.00667	1.09438	NA	0.999997	0.999999	2.26147	1.23255	1.08362	10.1399	1.30117	1.00112	1.01791	1.4466	1.03676	1.25497	4.67984	NA	4.67986	1.08695	1.00143
Slow loris	NAE1	NA	NA	NA	NA	NA	NA	NA	1.34244	1.08711	12.546	1.15353	1.42946	1.18644	1.20344	1.0015	NA	1.00148	NA	1.00158	1.18957	1.12988
Slow loris	NQO2	1.94261	1.01043	1.01682	NA	NA	NA	1.01669	NA	1.0169	37.6837	1.12771	1.08813	1.38574	1.0963	1.14269	1.95355	1.18124	NA	1.18122	1.04963	1.44354
Slow loris	ORAOV1	NA	1.7203	1.72023	NA	NA	NA	1.72027	NA	1.7203	27.7219	1.13916	1.02063	1.00993	NA	1.0101	1.2967	1.00022	NA	1.00022	1.45124	1.4984
Slow loris	PBXIP1	1.28961	1.01689	1.08938	1.01105	1.17603	1.00376	1.2438	1.432	1.06518	50.8346	1.14981	1.41449	1.2125	NA	1.10981	NA	1.06094	2.89488	3.49872	1.07689	1.6454
Slow loris	PDCD10	1.33401	1.06865	1.03147	1.01301	1.35626	1.1204	0.999995	NA	0.999996	11.7784	1.36581	NA	1.36584	1.20328	2.29832	NA	2.29834	1.38824	3.7782	1.08626	1.06327
Slow loris	PIP5K1A	NA	1.05618	1.18902	1.01773	NA	1.01759	1.04554	1.06215	1.25601	24.8052	1.0618	1.29594	1.29964	1.00837	1.13941	1.03431	1.05576	NA	1.03599	1.9061	1.34335
Slow loris	POLR2D	1.28911	1.6096	1.66184	1.01382	1.01556	1.06892	1.07408	1.69295	1.0332	186.791	1.15381	1.43693	1.35858	1.00872	1.0593	1.3673	1.08463	1.2663	1.79263	1.00787	1.5287
Slow loris	POLR2G	1.23699	2.40791	1.04434	1.01382	1.04512	1.0004	3.22918	1.71748	3.69161	298.337	1.05653	1.37474	1.08255	1.54083	1.16014	1.09309	1.11869	1.38767	1.04178	3.83496	1.57005
Slow loris	PRKAB1	NA	1.04279	1.12416	1.01435	1.49459	1.11783	1.01307	1.00603	1.56809	66.0417	1.14305	1.39589	1.02281	1.21272	1.04732	1.35146	1.00007	1.71851	1.00483	1.25455	1.57931
Slow loris	RAP1A	1.00284	1.13883	1.01702	1.00763	0.999959	1.10135	1.0893	NA	1.06649	13.9301	1.00852	1.22223	1.04181	1.04071	2.01117	NA	2.01116	NA	2.01118	1.04421	1.47176
Slow loris	RNF128	1.10464	1.13566	1.00111	1.00899	NA	1.08285	1.03781	NA	1.03267	306.877	1.02552	1.04687	1.43111	1.23011	1.15432	1.32907	1.11687	1.53118	1.67411	1.01449	1.36578
Slow loris	S100A13	1.00886	1.09353	1.18749	1.56085	1.04923	0.999996	1.09607	NA	1.07208	13.1111	1.22577	1.29443	1.44492	1.05191	1.07706	1.15263	1.06783	1.15924	1.98819	1.08393	1.43218
Slow loris	SAP18	1.33479	1.13073	1.31884	1.01447	1.44836	1.12724	1.21527	1.34242	1.1892	21.2375	1.10145	1.35999	1.04742	1.21962	1.38569	NA	1.38581	1.0784	3.08519	1.09292	1.54909
Slow loris	SERPINB1	1.04258	1.07306	1.19814	1.10947	1.30824	1.00622	1.18372	1.58128	1.17264	1281.66	1.0126	NA	1.02056	NA	1.01979	1.32097	1.01274	1.11473	2.83045	1.00417	1.06915
Slow loris	SERPINB6	NA	NA	NA	1.00001	NA	0.999999	0.999998	1.1495	1.35142	36678100	NA	1.02542	1.02604	1.16486	1.08765	NA	1.08769	1.05642	2.19076	2.12218	1.36541
Slow loris	SNRPD2	1.04563	1.00442	1.28884	1.00326	NA	1.02483	1.00035	NA	1.00035	109.57	NA	1.13894	1.13883	NA	1.13898	NA	1.13903	NA	1.13903	1.88416	1.00072
Slow loris	THUMPD3	NA	NA	NA	NA	1.83127	1.83127	1.83126	NA	1.83123	18.6681	0.999995	1.04335	1.43248	1.26787	1.20625	1.06874	1.01833	1.11897	1.0605	3.09581	1.15516
Slow loris	TMEM128	NA	NA	NA	1.00815	1.24942	1.06282	1.23914	1.66769	1.17071	42.3624	0.999986	1.38916	0.999943	1.1028	1.16572	1.81083	3.33731	NA	3.33731	1.07361	1.2548
Slow loris	TMX1	1.32153	1.13753	1.27666	NA	0.999994	0.999997	1.02565	2.44695	1.00469	12.8289	1.54902	1.86411	1.45046	1.01798	1.02009	1.29059	1.04348	1.64802	4.47	1.09259	1.28354
Slow loris	TOR1A	1.11795	1.69797	1.12867	1.01446	1.23023	1.04078	1.65168	1.6849	1.46927	85.8608	1.08419	0.999943	3.22767	1.25828	2.16985	1.00147	1.00825	1.71144	1.01929	1.79483	1.4993
Slow loris	TRNT1	NA	2.52979	2.52973	NA	NA	NA	2.5298	NA	2.52979	42.3639	NA	1.10845	1.10833	NA	1.10845	1.16542	1.63474	NA	1.63474	1.00605	1.01886
Slow loris	TSPAN17	NA	3.01522	3.01522	NA	NA	NA	3.01521	NA	3.01521	2135.56	1.0016	NA	1.0016	1.00177	1.15914	NA	1.08571	1.12867	1.05411	2.88654	1.44203
Slow loris	UBE2J1	1.32734	1.14239	1.36655	1.01331	1.50241	1.10325	1.17508	1.13834	1.19426	46.0866	1.05057	1.40169	1.0757	1.01166	1.41002	1.36957	1.22723	1.00119	4.6002	1.10058	1.58896
Slow loris	USO1	NA	1.03035	1.03023	NA	NA	NA	1.03021	1.05051	3.39635	6981660000	1.02019	1.19302	1.01452	NA	1.01452	1.33938	1.02505	1.25638	3.43262	3.04541	1.55157
Slow loris	VAMP3	1.21809	1.09736	1.36044	1.01489	1.47303	1.12208	1.23774	1.45944	1.06497	17.2938	1.10266	1.31913	1.21594	NA	1.21599	1.28988	1.02326	NA	1.02339	1.0651	1.20049
Slow loris	XPO5	NA	NA	NA	NA	1.01033	1.00635	1.01033	NA	1.01029	28.4521	1.02033	NA	1.03402	1.0009	1.83338	1.18817	1.14162	NA	1.14159	1.02503	1.35236
Slow loris	ZCCHC9	NA	1.07987	1.29925	1.01415	1.49323	1.11461	1.26711	1.2121	1.2786	10.6444	1.03789	1.4324	1.69232	1.10402	1.05908	NA	1.05907	NA	1.05911	1.01209	1.36845
Ancestral strepsirrhines	AADAC	1.1292	1.01107	1.16245	1.01318	1.49254	1.11846	1.2126	4.5625	1.55011	1.02308	NA	1.13367	1.23223	1.52244	3.75253	NA	3.75254	NA	3.75253	17.4217	1.20974
Ancestral strepsirrhines	ARF5	1.06729	1.1402	1.33391	1.01436	1.23104	1.03723	1.02195	1.00112	1.83795	1.94104	1.15308	1.17135	1.08341	NA	1.08363	NA	1.0836	NA	1.08362	15.071	1.00945
Ancestral strepsirrhines	CWC15	1.05054	1.28305	1.23369	1.18129	1.30642	1.12709	1.10516	1.4983	3.23847	1.50353	1.1777	1.30032	1.33828	1.02925	1.04377	1.3264	1.17534	0.999952	4.7971	18.412	1.0041
Ancestral strepsirrhines	DCAKD	NA	NA	NA	1.85543	NA	1.85566	1.85553	NA	1.85565	1.04672	NA	1.08662	1.13733	1.00313	1.09897	NA	1.05588	1.08749	1.63595	10.1688	1.0644
Ancestral strepsirrhines	GLA	1.23286	1.13378	1.0557	1.00514	1.44137	1.06953	1.94706	NA	1.94715	1.13404	1.04978	1.41031	1.04379	1.01036	1.14095	NA	1.07686	1.77941	2.41384	12.5633	1.09611
Ancestral anthropoids	ABCG2	1.28997	1.00278	1.27907	NA	1.2267	1.07829	1.11421	1.31473	15.3896	1.01427	1.12756	1.38501	1.00002	1.23013	1.08492	NA	1.08498	NA	1.08503	2.32834	1.01066
Ancestral anthropoids	AHCY	1.18449	1.11581	1.00909	1.01401	1.26438	1.11176	1.64238	1.01917	16.6828	1.46693	NA	NA	NA	NA	NA	NA	NA	NA	NA	1.46715	1.36288
Ancestral anthropoids	ATP5G1	1.14174	1.11936	1.02449	1.00476	NA	1.03918	3.33091	1.03104	80.2542	1.01476	1.04139	1.42483	1.79261	1.02309	1.00442	2.98253	1.01893	NA	1.01896	2.00847	1.50474
Ancestral anthropoids	IGFBP3	1.00219	1.04484	1.3314	1.01117	1.29367	1.00458	1.00595	1.55685	10.0274	NA	1.0015	NA	1.0015	1.14853	1.17373	1.27559	1.65906	1.63902	2.61391	2.61391	1.22702
Ancestral anthropoids	LSM10	1.26063	1.0054	1.59808	1.01046	1.57317	4.95544	1.00014	2.92211	48.0609	NA	NA	NA	NA	NA	NA	NA	NA	1.57447	1.57471	1.57471	1.84817
Ancestral catarrhines	CCDC43	NA	1.13783	1.13781	1.08644	NA	1.08639	29.0118	2.86992	1.01627	1.07426	1.19788	1.31401	1.18472	1.05005	1.10455	1.28145	1.08624	NA	1.05435	1.03324	1.43272
Ancestral catarrhines	DEXI	1.01231	1.97883	1.08782	1.014	1.03152	1.01464	21.4961	1.25024	1.51547	1.06185	1.03777	1.40499	1.13042	1.26603	1.20818	1.37396	1.12225	1.67048	1.07619	0.999996	1.13907
Ancestral catarrhines	LEPROTL1	NA	3.62382	3.62374	1.00928	NA	1.0859	12.0685	2.39963	1.00333	1.76438	1.07846	1.00225	1.32294	1.26018	1.13159	1.34494	1.10923	1.04188	1.06319	1.06439	1.43374
Ancestral catarrhines	MIF4GD	1.16638	1.68604	1.30679	1.00252	NA	1.01687	15.5201	4.13327	1.04521	NA	1.00056	1.41664	1.0387	1.52946	1.09383	NA	1.05331	1.27106	1.01166	1.01156	1.42336
Ancestral catarrhines	MLST8	1.52498	1.0803	1.01521	1.01478	1.00435	1.00473	10.3853	3.25186	1.04058	1.40881	NA	1.16276	1.29233	2.0795	2.47597	1.10956	1.07703	1.42445	1.01133	1.08554	1.34322
Ancestral catarrhines	MPI	NA	1.1666	1.16664	1.01138	1.57311	1.09673	62.5904	0.999908	4.59346	1.01047	1.0178	1.12151	1.12177	1.10805	1.1683	NA	1.09015	1.00223	1.01401	1.84205	1.34818
Ancestral catarrhines	NF2	1.16004	NA	1.16028	1.0124	1.10681	1.00151	11.7776	1.02825	1.60267	1.60199	1.1435	1.44246	1.2119	1.09894	1.19395	1.29786	1.14571	NA	1.14575	1.47427	1.54714
Ancestral catarrhines	RBL2	1.04088	1.12495	0.999973	NA	1.07689	1.07752	10.7095	1.00706	1.98406	1.7137	1.00348	NA	1.00361	NA	1.00361	NA	1.0036	1.33896	3.86531	3.36326	1.38665
Ancestral hominids	DDAH2	1.01526	1.11807	21.9973	1.00376	1.10047	1.54878	1.26169	NA	1.2618	1.67693	1.09321	1.3381	1.33158	1.14636	1.18487	1.05053	1.25326	NA	1.25326	1.2006	1.45225
Ancestral hominids	FTCD	3.89303	1.13166	19.9212	NA	1.23828	1.23873	1.47303	1.14486	1.0117	NA	1.74602	0.999977	1.0837	NA	1.08359	2.28313	1.02234	NA	1.01502	1.02125	1.40538
Ancestral hominids	MRPL34	1.26153	2.29691	14.5902	1.01401	1.02154	1.00409	2.90696	1.6689	2.37679	1.04137	1.16639	1.38535	1.45057	1.10806	1.09209	1.16692	1.12452	1.66016	1.07559	1.0032	1.00503
Ancestral hominids	RHBDD2	1.00721	1.15001	16.8822	NA	1.00031	1.00031	3.11664	1.56389	1.08415	NA	1.05464	NA	1.05413	NA	1.05465	NA	1.05464	1.44659	1.01287	1.01786	1.48283
Ancestral hominids	STT3A	1.31056	2.62627	11.5123	1	1.45968	1.08342	1.35558	1.11356	1.14869	1.74233	1.1652	1.00279	1.03539	1.19985	1.17953	1.07344	1.11006	1.30457	1.02259	1.04843	1.22931
Ancestral primates	ACOX3	1.1321	NA	1.17926	NA	1.00256	1.00256	1.15132	1.10851	2.5829	NA	1.01999	NA	1.03214	1.00192	1.67507	1.06835	1.07526	1.62033	1.04647	1.06902	181.466
Ancestral primates	ADK	1.31973	1.1124	1.10188	1.01489	1.47027	1.11993	1.01509	1.08656	1.75131	1.76252	1.17887	1.35512	2.36114	3.1198	1.15754	NA	1.08495	1.43043	1.04327	1.04151	80.4707
Ancestral primates	ATAD1	1.01648	1.01033	1.29041	1.01227	1.50561	1.10091	1.0012	1.03329	2.59692	1.38976	1.00645	1.13697	1.3202	1.25243	1.11279	1.31891	1.11115	1.03076	1.03135	1.08313	10.0461
Ancestral primates	BOLA3	NA	NA	NA	1.00117	NA	1.00886	1.01761	NA	1.01636	1.08401	NA	NA	NA	1.12459	1.10519	1.28892	1.04521	NA	1.02936	1.11311	11.6731
Ancestral primates	C9orf64	1.00747	0.999995	1.26865	NA	1.09337	1.04051	1.02139	NA	1.02152	NA	1.18055	1.15022	1.03017	1.25701	1.00053	1.35038	1.02051	3.22809	1.06876	1.06876	23.7153
Ancestral primates	CEPT1	NA	1.11371	1.11306	NA	1.22648	1.07804	1.01072	1.06183	1.14004	1.29928	NA	NA	NA	2.92593	2.92593	NA	2.92593	1.07637	1.03793	2.05376	40.8183
Ancestral primates	CIRBP	1.22338	1.14173	1.29006	1.01176	1.60199	1.12502	1.2146	NA	1.1489	1.32153	1.14584	1.28126	1.01113	2.72581	0.999987	1.02851	1.11651	2.5647	2.8142	1.89726	11.0005
Ancestral primates	CLU	1.33241	1.12882	1.25574	1.00642	1.81785	1.04373	1.21734	1.68476	1.1153	1.74282	1.15858	1.07789	1.00167	1.18364	1.17088	1.3157	1.00456	1.72094	1.01983	1.15326	11.104
Ancestral primates	DLST	1.33236	1.11273	1.17032	1.00479	1.26514	1.1127	1.01196	1.5435	1.03256	1.00226	0.999982	1.01916	1.37512	1.26183	1.21092	1.28285	1.08731	1.65924	1.06667	1.01554	18.2072
Ancestral primates	ERO1LB	1.03661	1.08669	1.16011	1.00364	1.16457	1.11864	1.22694	1.45952	1.05269	1.30383	1.05282	NA	1.21703	NA	1.11213	1.08306	1.09061	1.21797	1.00712	1.17536	41.1202
Ancestral primates	FBXO3	1.0148	1.00002	1.36488	1.09534	1.40256	1.00204	1.08387	1.54724	1.00139	NA	1.02123	NA	1.02023	0.999996	1.20449	1.74644	1.39891	1.48993	1.16565	1.1656	72.6397
Ancestral primates	HACL1	1.05526	1.14196	1.05325	1.00939	1.48062	1.0832	1.69727	NA	1.69728	NA	NA	NA	NA	1.17088	1.14253	1.33226	1.09913	1.48484	1.03811	1.05619	13.3349
Ancestral primates	IDE	NA	NA	NA	1.00486	NA	1.04245	1.14698	1.05655	1.34149	1.00513	3.88842	1.33661	1.03518	NA	1.03508	1.26439	1.05662	1.00441	1.26319	1.02401	74.7327
Ancestral primates	KRCC1	1.315	1.0766	1.10205	1.01465	1.49521	1.11908	1.05682	1.27045	1.64843	1.00964	1.02603	1.18744	1.33387	1.13073	1.00001	1.03514	1.54304	1.12673	1.01159	1.09148	11.6385
Ancestral primates	LONP2	1.31102	1.13127	1.36147	1.06739	1.44894	1.00733	1.08033	1.50856	0.999999	NA	1.17081	1.43991	1.34612	1.14142	1.00012	1.16771	1.0867	1.05127	1.07571	1.07563	25.1823
Ancestral primates	LYPLA1	1.32988	1.09955	1.15417	1.00852	NA	1.07776	1.26084	1.08189	1.02517	1.60141	NA	NA	NA	2.93016	2.93016	1.16738	1.0929	1.42312	1.01042	1.04789	14.0699
Ancestral primates	MDH1	1.17725	1.06672	1.19092	1.0148	1.43239	1.1221	1.18567	1.40162	1.00179	1.60153	1.17125	1.20735	1.03282	1.23899	1.01826	1.27724	1.09378	1.58869	1.0725	1.028	25.3558
Ancestral primates	MFN1	NA	NA	NA	1.00907	1.33036	1	1	1.54472	1.07328	NA	1.04844	1.10363	1.4455	1.39598	1.43496	1.12893	1.09848	1.28788	1.00732	1.00919	84.211
Ancestral primates	MGST1	1.05163	1.11485	1.3269	1.01044	1.50561	1.08186	0.999991	1.08958	1.15675	1.6524	1.55499	2.00379	1.44804	1.26664	1.21828	1.33277	1.11945	1.53485	1.09277	1.44163	14.9829
Ancestral primates	MPP6	NA	1.04204	1.04178	NA	1.22435	1.07728	1.042	NA	1.04227	1.58297	NA	1.03053	1.03046	NA	1.03041	NA	1.03053	NA	1.03054	1.00379	12.8322
Ancestral primates	NCKAP1	1.00033	0.999994	1.34131	1.00723	1.4928	1.0507	1.03305	NA	1.03304	1.2385	1.0676	NA	1.29744	1.12666	1.6445	1.25502	1.18101	NA	1.18106	1.00284	10.7956
Ancestral primates	NDUFA9	1.18369	1.13061	1.00323	1.01309	1.4634	1.12521	1.00608	1.71175	1.017	1.38336	1.07576	1.05628	1.18271	1.01083	1.24773	1.32553	1.02924	4.80715	1.00419	1.15796	33.9946
Ancestral primates	PEX13	1.96347	1.07898	1.16645	NA	1.24283	1.24329	1.00073	1.67997	1.01439	1.03899	1.0049	1.16408	1.27783	1.05508	1.07313	1.1542	2.13524	NA	2.13524	1.00355	10.6284
Ancestral primates	PEX7	1.00233	NA	1.00185	NA	1.18705	1.06687	1.29376	1.25631	1	1.10945	1.16738	1.43626	1.29885	1.03353	1.17371	1.15694	1.12008	1.00595	1.02475	1.17258	61.1534
Ancestral primates	PHYH	1.16584	1.07031	1.01386	1.01338	1.48807	1.11283	1.25747	NA	1.25759	NA	1.06308	1.05888	1.44418	1.09634	1.09348	1.21104	1.1109	1.02835	1.01172	1.0116	72.5334
Ancestral primates	POMP	1.29586	1.1273	1.12045	1.01141	1.00403	1.42386	1.07041	1.65141	1.22036	1.18482	1.00085	1.31842	1.04655	1.22008	1.01805	1.0001	1.12032	1.00059	1.00422	1.0561	13.5991
Ancestral primates	RCN1	1.46976	1.03632	1.28053	1.00098	1.00012	1.12776	1.17641	1.33884	1.1912	1.70652	1.17811	1.35077	1.38808	1.26618	1.17923	1.22932	1.03236	1.03171	1.95837	3.51463	32.9064
Ancestral primates	SAR1B	1.04371	1.04513	1.35669	1.03523	1.37635	1.10426	1.12125	1.03684	1.19353	1.50046	1.26028	1.46774	1.44978	1.01599	1.02463	1.37103	1.04503	1.19389	2.59594	1.91752	15.8531
Ancestral primates	SCP2	1.33531	1.07087	1.06766	1.00648	1.50447	1.02687	1.28774	1.03584	1.01579	1.00881	1.12226	1.44291	1.15906	1.17621	1.0144	1.2628	1.05853	1.35304	1.07117	1.02144	17.9583
Ancestral primates	SELT	1.30031	1.14288	1.31782	1.01307	1.48325	1.08766	0.999997	NA	0.999998	1.47411	1.16669	1.37778	1.44893	1.13672	1.12433	1.06928	1.05727	1.3718	1.57021	1.26542	55.2531
Ancestral primates	SUCLA2	0.999995	NA	0.999994	1.00616	NA	1.05411	1.53064	1.49472	1.13796	NA	1.06322	1.04567	1.42092	1.25642	1.17851	1.35908	1.10486	1.0548	1.00351	1.0035	46.363
Ancestral primates	TMEM30A	1.04446	1.06277	1.36556	1.58897	1.28106	1.09333	1.38078	1.17403	1.15813	1.11048	1.72473	1.42301	1.33488	1.35559	2.21203	1.31272	1.36943	1.31097	2.7159	1.47014	13.6246
Ancestral primates	ZHX1	1.15274	NA	1.20953	1.0138	1.44574	1.10138	1.18546	NA	1.13016	1.49229	NA	NA	NA	NA	NA	1.03666	1.03708	1.29261	1.34502	2.47971	30.4671
