# Supplementary material for: Comparative RNA sequencing reveals substantial genetic variation in endangered primates
Source: HighWire-hosted journal article supplement (doi:10.1101/gr.130468.111), 2011-12-29
Supplement: SuppTable8.xlsx [file SuppTable8.xlsx]

## Sheet: RNA.indiv.index
Species	Individual	Flowcell (run) and lane	Source	Sex	Comments
Armadillo	Dno9-29	Armadillo_run8_s_4	Truman	Female	euthanized
Armadillo	Dno9-35	Armadillo_run8_s_5	Truman	Female	euthanized
Aye aye	Dm6514m	AyeAye_run2_s_3	Duke	Male	5.5 yrs old; 2 hrs time death to freezer
Aye aye	Dm6262f	AyeAye_run2_s_7	Duke	Female	1 yr old.
Aye aye	Dm6725m	AyeAye_run3_s_5	Duke	Male	10 yrs old; 1.25 hours time death to freezer
Aye aye	Dm6261f	AyeAye_run5_s_2	Duke	Female
Black and white ruffed lemur	Vvv6513m	BWLemur_run2_s_5	Duke	Male
Black and white ruffed lemur	Vvv586m	BWLemur_run3_s_4	Duke	Male
Black and white ruffed lemur	Vvv4598m	BWLemur_run4_s_6	Duke	Male
Black and white ruffed lemur	Vvv1501m	BWLemur_run5_s_6	Duke	Male
Chimpanzee	PtrYN06-108	Chimp_run1_s_2	Yerkes	Female
Chimpanzee	PtrYN05-400	Chimp_run1_s_7	Yerkes	Female
Chimpanzee	PtrYN07-147	Chimp_run3_s_2	Yerkes	Male
Chimpanzee	PtrYN06-147	Chimp_run4_s_2	Yerkes	Male
Crowned lemur	Ec4525f	CrownedLemur_run3_s_1	Duke	Female
Crowned lemur	Ec4524f	CrownedLemur_run4_s_5	Duke	Female
Crowned lemur	Ec6035m	CrownedLemur_run5_s_5	Duke	Male
Crowned lemur	Ec6034m	CrownedLemur_run6_s_5	Duke	Male
Moholi bushbaby	Gsm2001f	Galago_run6_s_1	Duke	Female	6 yrss old; euthanized
Moholi bushbaby	Gsm3133f	Galago_run6_s_6	Duke	Female	11 yrs old.
Moholi bushbaby	Gsm3135m	Galago_run7_s_3	Duke	Male	9 yrs old; euthanized
Moholi bushbaby	Gsm2000m	Galago_run7_s_6	Duke	Male	7 yrs old.
Human	Hsa58876	Human_run1_s_1	NDRI	Female
Human	Hsa56295	Human_run1_s_6	NDRI	Male
Human	Hsa56655	Human_run3_s_7	NDRI	Female
Human	Hsa56720	Human_run5_s_1	NDRI	Female
Rhesus macaque	Mmu17602	Macaque_run1_s_3	Yerkes	?
Rhesus macaque	MmuYN05-349	Macaque_run1_s_5	Yerkes	Female
Rhesus macaque	Mmu17550	Macaque_run3_s_8	SFBR	Female
Rhesus macaque	MmuYN06-52	Macaque_run4_s_1	Yerkes	Male
Common marmoset	Cja18906	Marmoset_run2_s_4	SFBR	Female
Common marmoset	Cja17060	Marmoset_run3_s_6	SFBR	Female
Common marmoset	Cja270-17090	Marmoset_run4_s_4	SFBR	Female
Common marmoset	Cja27565	Marmoset_run4_s_8	SFBR	Male
Mongoose lemur	Em5716m	MongooseLemur_run4_s_3	Duke	Male
Mongoose lemur	Em5717f	MongooseLemur_run4_s_7	Duke	Female
Mongoose lemur	Em4504m	MongooseLemur_run5_s_4	Duke	Male
Mongoose lemur	Em5719f	MongooseLemur_run5_s_7	Duke	Female
Mouse	Mouse276016	Mouse_run6_s_4	Nachman/Dean	?	euthanized after fasting for 3 hours
Mouse	Mouse276023	Mouse_run6_s_8	Nachman/Dean	?	euthanized after fasting for 3 hours
Mouse	Mouse277160	Mouse_run7_s_2	Nachman/Dean	?	euthanized after fasting for 3 hours
Mouse	Mouse276025	Mouse_run8_s_1	Nachman/Dean	?	euthanized after fasting for 3 hours
Gray short-tailed opossum	MdoL8148	Opossum_run7_s_1	SFBR	Male
Gray short-tailed opossum	MdoL7013	Opossum_run7_s_4	SFBR	Female
Gray short-tailed opossum	MdoL4394	Opossum_run7_s_7	SFBR	Female
Gray short-tailed opossum	MdoL9211	Opossum_run8_s_3	SFBR	Male
Coquerel's sifaka	Pvc597m	Sifaka_run2_s_2	Duke	Male	20 yr old. 3 hours time death to freezer
Coquerel's sifaka	Pvc6399m	Sifaka_run2_s_6	Duke	Male	1.5 yr old. 1 hour time death to freezer
Coquerel's sifaka	Pvc6723f	Sifaka_run5_s_3	Duke	Female	6 yr old. 3 hrs time death to freezer
Coquerel's sifaka	Pvc6108f	Sifaka_run6_s_3	Duke	Female	22 yrs old; 4 hrs time death to freezer
Slow loris	Nc1960m	SlowLoris_run6_s_2	Duke	Male	22 yrs old; euthanized
Slow loris	Nc1949m	SlowLoris_run6_s_7	Duke	Male	15 yrs old; euthanized
Slow loris	Nc1972f	SlowLoris_run7_s_5	Duke	Female	10 yrs old; euthanized
Slow loris	Nc961m	SlowLoris_run8_s_2	Duke	Male	12 yrs old; euthanized
Northern tree shrew	TbeM8182	TreeShrew_run7_s_8	Fitzpatrick	Male	euthanized
Northern tree shrew	TbeF7498	TreeShrew_run8_s_6	Fitzpatrick	Female	euthanized
Northern tree shrew	TbeM8174	TreeShrew_run8_s_7	Fitzpatrick	Male	euthanized
Northern tree shrew	TbeM8002	TreeShrew_run8_s_8	Fitzpatrick	Male	euthanized
Vervet	Cae06815	Vervet_run2_s_1	Alpha Genesis	Female	euthanized
Vervet	Cae09168	Vervet_run2_s_8	Alpha Genesis	Female	euthanized
Vervet	Cae06789	Vervet_run3_s_3	Alpha Genesis	Male	euthanized
Vervet	Cae06471	Vervet_run5_s_8	Alpha Genesis	Male	euthanized
NDRI: National Disease Research Interchange; Yerkes: Yerkes National Primate Research Center; SFBR: Southwest Foundation for Biomedical Research; Duke: Duke Lemur Center; Fitzpatrick: David Fitzpatrick – Duke University; Nachman/Dean: Michael Nachman and Matt Dean – University of Arizona; Truman: Richard Truman – National Hansen’s Disease Program, Louisiana State University School of Veterinary M…
