# Supplementary figures and images for: Comparative RNA sequencing reveals substantial genetic variation in endangered primates
Source: HighWire-hosted journal article supplement (doi:10.1101/gr.130468.111), 2011-12-29

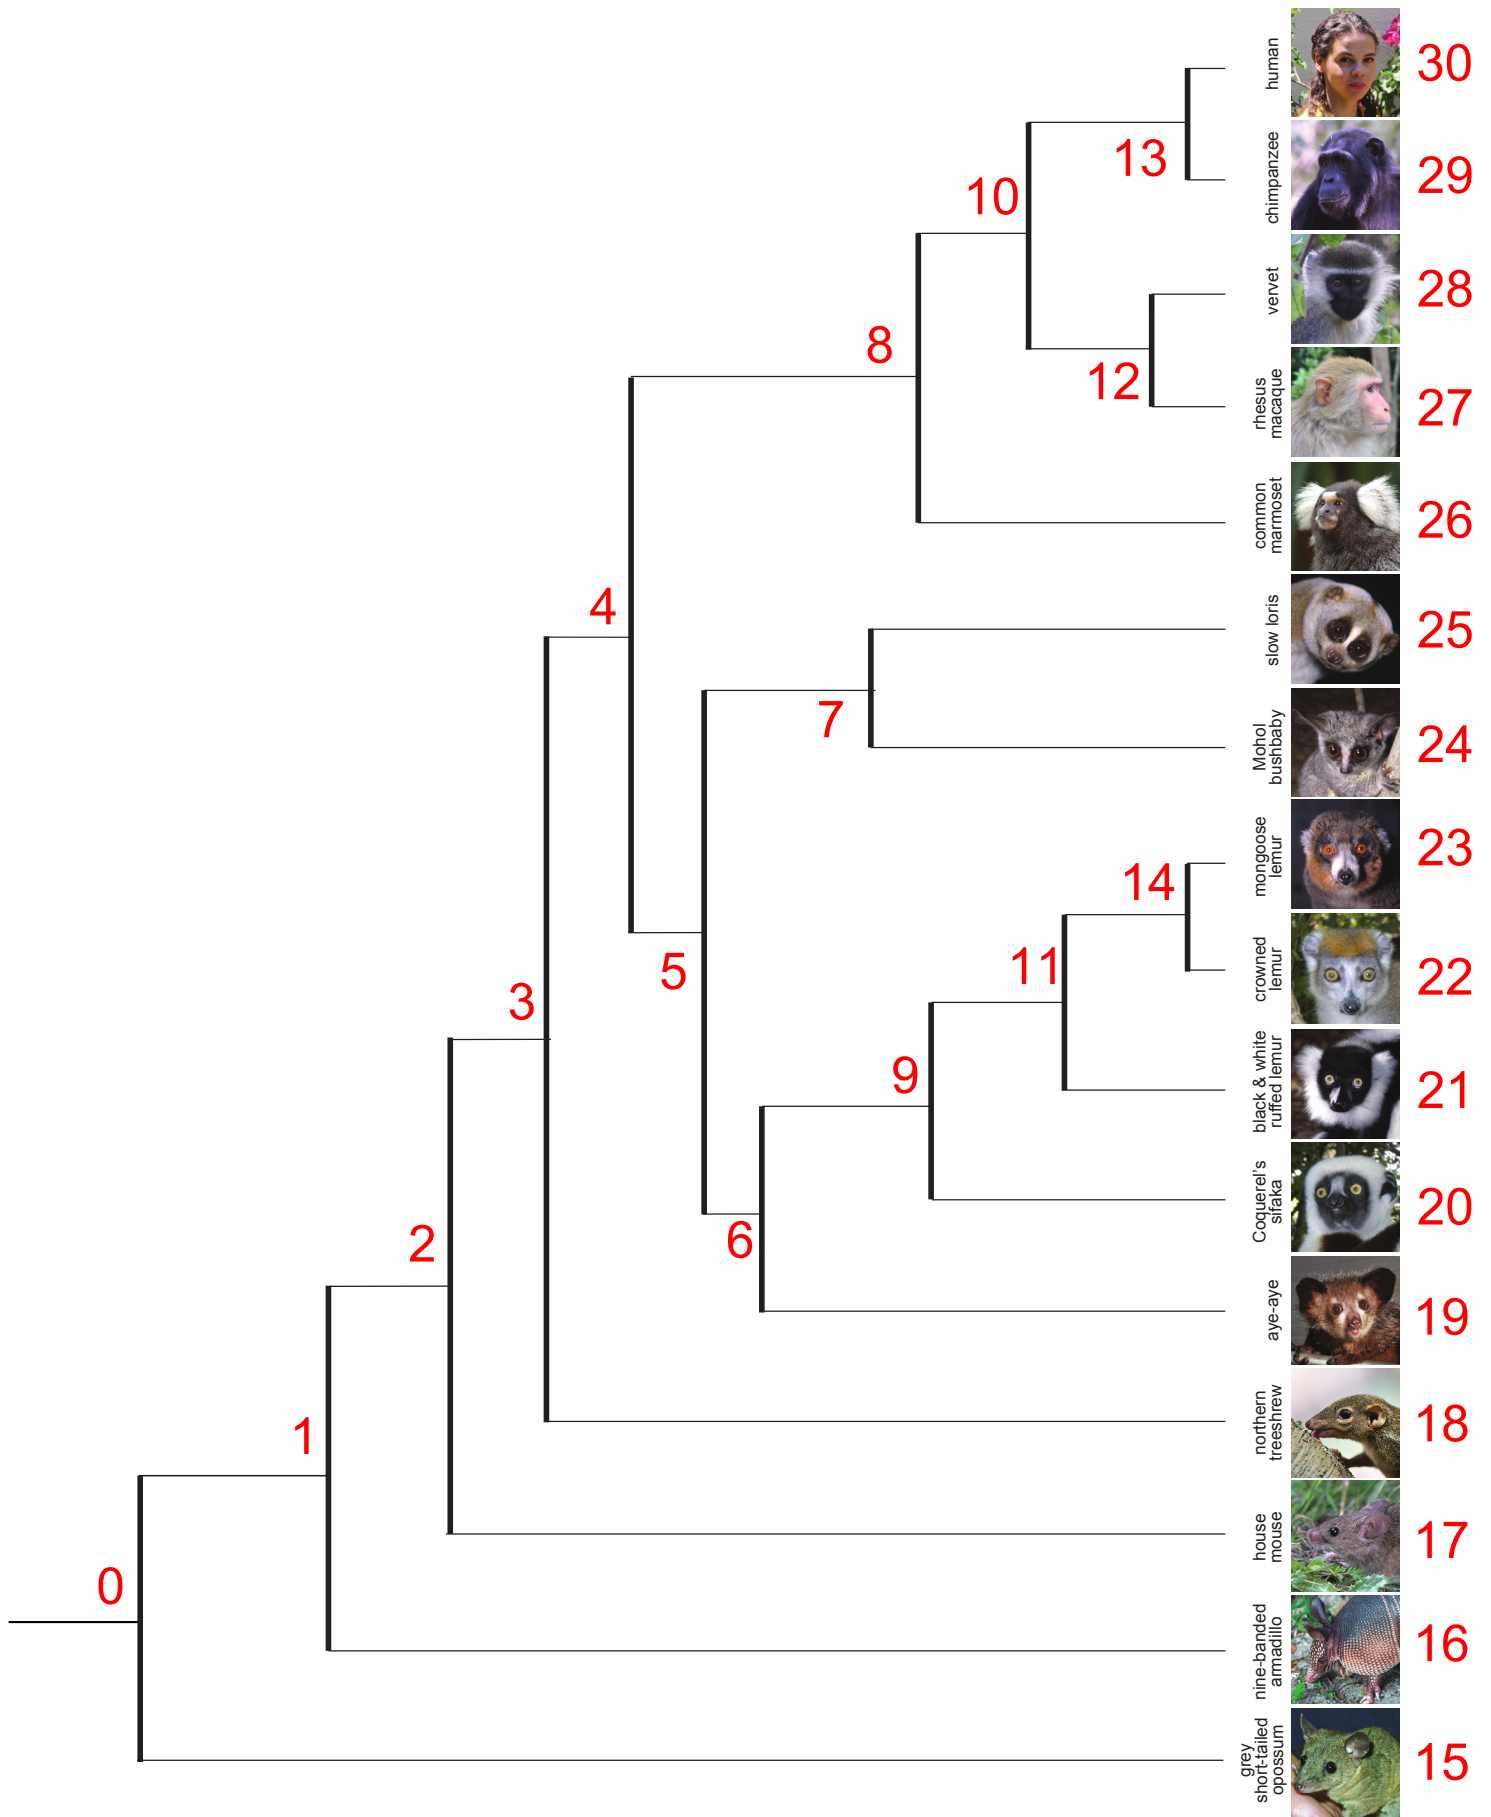

Supplement: Supplemental.Database.primateRNAseq.zip [file Phylo Fig with Node Annotation.pdf › Phylo Fig with Node Annotation.pdf]
